# Supplementary material for: Transcriptome Analysis Reveals Putative Genes Involved in Iridoid Biosynthesis in Rehmannia glutinosa
Source: Int J Mol Sci. 2012 Oct 23;13(10):13748–63. doi: 10.3390/ijms131013748 (PMC3509546; doi:10.3390/ijms131013748)
Supplement: Supplementary file 1 [file ijms-13-13748-s001.xls]

## Sheet: Sheet1
Enzyme code	Gene ID	UnigeneID	Gene length	Total reads	Nr Score	Nr E-value	Nr ID	Nr annotation	Nt Score	Nt E-value	Nt-ID	Nt-annotation	UniProt Score	UniProt E-value	Uniprot-ID	UniProt annotation	COG Score	COG E-value	COG-Protein-or-Domain	COG-ID	COG-Function-Description	KEGG Score	KEGG E-value	KEGG Gene	ko_definition	Map_id	Map Annotation	GO-BiologicalProcess	GO-CellularComponent	GO-MolecularFunction
2.3.1.9	Contig8783	Unigene_21433	187	3	66.2	1e-13	gb|ABD57973.1|	acetoacetyl-coenzyme A thiolase [Arnebia euchroma]	194	1e-46	gb|DQ347964.1|	Picrorhiza kurrooa acetoacetyl-CoA thiolase mRNA, complete cds	66.2	1e-13	tr|A7ISS1|A7ISS1_9BORA	Acetoacetyl-coenzyme A thiolase OS=Arnebia euchroma PE=2 SV=1	48.1	5e-06	SPBC215.09c	COG0183	Acetyl-CoA acetyltransferase	67	5e-13	rcu:RCOM_0860740	acetyl-CoA acetyltransferase, mitochondrial, putative (EC:2.3.1.9); K00626 acetyl-CoA C-acetyltransferase [EC:2.3.1.9]	map00310;map00072;map00900;map00620;map00650;map00632;map00640;map00280;map00380;map02020;map00071	Lysine degradation;Synthesis and degradation of ketone bodies;Terpenoid backbone biosynthesis;Pyruvate metabolism;Butanoate metabolism;Benzoate degradation via CoA ligation;Propanoate metabolism;Valine, leucine and isoleucine degradation;Tryptophan metabolism;Two-component system;Fatty acid metabolism	/	/	transferase activity, transferring acyl groups other than amino-acyl groups;
	Contig16773	Unigene_1748	343	2	179	1e-43	gb|ADD10719.1|	acetyl-CoA C-acetyltransferase protein [Camellia oleifera]	351	2e-93	gb|DQ347964.1|	Picrorhiza kurrooa acetoacetyl-CoA thiolase mRNA, complete cds	179	1e-43	tr|D3YN47|D3YN47_9ERIC	Acetyl-CoA C-acetyltransferase protein OS=Camellia oleifera PE=2 SV=1	86.7	1e-17	SPBC215.09c	COG0183	Acetyl-CoA acetyltransferase	173	3e-42	pop:POPTR_732472	hypothetical protein; K00626 acetyl-CoA C-acetyltransferase [EC:2.3.1.9]	map00310;map00072;map00900;map00620;map00650;map00632;map00640;map00280;map00380;map02020;map00071	Lysine degradation;Synthesis and degradation of ketone bodies;Terpenoid backbone biosynthesis;Pyruvate metabolism;Butanoate metabolism;Benzoate degradation via CoA ligation;Propanoate metabolism;Valine, leucine and isoleucine degradation;Tryptophan metabolism;Two-component system;Fatty acid metabolism	/	/	transferase activity, transferring acyl groups other than amino-acyl groups;
	GLRWUMC01DYX3S	Unigene_8936	202	1	97.8	2e-22	ref|XP_002265690.1|	PREDICTED: hypothetical protein [Vitis vinifera] emb|CBI28461.1| unnamed protein product [Vitis vinifera]	163	5e-37	gb|DQ347964.1|	Picrorhiza kurrooa acetoacetyl-CoA thiolase mRNA, complete cds	95.5	4e-22	tr|B9IAU7|B9IAU7_POPTR	Predicted protein OS=Populus trichocarpa GN=POPTRDRAFT_732472 PE=3 SV=1	79.3	1e-17	SPBC215.09c	COG0183	Acetyl-CoA acetyltransferase	97.8	6e-23	vvi:100240809	hypothetical protein LOC100240809; K00626 acetyl-CoA C-acetyltransferase [EC:2.3.1.9]	map00310;map00072;map00900;map00620;map00650;map00632;map00640;map00280;map00380;map02020;map00071	Lysine degradation;Synthesis and degradation of ketone bodies;Terpenoid backbone biosynthesis;Pyruvate metabolism;Butanoate metabolism;Benzoate degradation via CoA ligation;Propanoate metabolism;Valine, leucine and isoleucine degradation;Tryptophan metabolism;Two-component system;Fatty acid metabolism	/	/	transferase activity, transferring acyl groups other than amino-acyl groups;
	GLRWUMC01A5Q0S	Unigene_7432	429	1	84	5e-15	dbj|BAF98276.1|	acetyl-CoA C-acetyltransferase [Hevea brasiliensis]	194	3e-46	gb|DQ347964.1|	Picrorhiza kurrooa acetoacetyl-CoA thiolase mRNA, complete cds	84	5e-15	tr|Q5XMB8|Q5XMB8_TOBAC	Cytosolic acetoacetyl-coenzyme A thiolase OS=Nicotiana tabacum GN=AACT1 PE=2 SV=1	63.2	2e-10	YPL028w	COG0183	Acetyl-CoA acetyltransferase	83.2	4e-15	vvi:100262136	similar to acetyl-CoA C-acyltransferase, putative / 3-ketoacyl-CoA thiolase, putative	/	/	/	/	transferase activity, transferring acyl groups other than amino-acyl groups;
	GLRWUMC01DNONL	Unigene_1748	129	1	73.6	7e-12	gb|ADD10719.1|	acetyl-CoA C-acetyltransferase protein [Camellia oleifera]	85.7	5e-14	gb|DQ347964.1|	Picrorhiza kurrooa acetoacetyl-CoA thiolase mRNA, complete cds	73.6	7e-12	tr|D3YN47|D3YN47_9ERIC	Acetyl-CoA C-acetyltransferase protein OS=Camellia oleifera PE=2 SV=1	58.5	4e-09	SPBC215.09c	COG0183	Acetyl-CoA acetyltransferase	71.6	1e-11	ath:AT5G48230	ACAT2/EMB1276 (ACETOACETYL-COA THIOLASE 2); acetyl-CoA C-acetyltransferase ; K00626 acetyl-CoA C-acetyltransferase [EC:2.3.1.9]	map00310;map00072;map00900;map00620;map00650;map00632;map00640;map00280;map00380;map02020;map00071	Lysine degradation;Synthesis and degradation of ketone bodies;Terpenoid backbone biosynthesis;Pyruvate metabolism;Butanoate metabolism;Benzoate degradation via CoA ligation;Propanoate metabolism;Valine, leucine and isoleucine degradation;Tryptophan metabolism;Two-component system;Fatty acid metabolism	/	/	transferase activity, transferring acyl groups other than amino-acyl groups;
	GLRWUMC01CIAYW	Unigene_21575	266	1	150	4e-35	gb|AAU95618.1|	cytosolic acetoacetyl-coenzyme A thiolase [Nicotiana tabacum]	285	6e-74	gb|DQ347964.1|	Picrorhiza kurrooa acetoacetyl-CoA thiolase mRNA, complete cds	150	4e-35	tr|Q5XMB8|Q5XMB8_TOBAC	Cytosolic acetoacetyl-coenzyme A thiolase OS=Nicotiana tabacum GN=AACT1 PE=2 SV=1	99.8	2e-21	SPBC215.09c	COG0183	Acetyl-CoA acetyltransferase	148	9e-35	rcu:RCOM_0690990	acetyl-CoA acetyltransferase, mitochondrial, putative (EC:2.3.1.9)	/	/	/	/	transferase activity, transferring acyl groups other than amino-acyl groups;
2.3.3.10	Contig1861	Unigene_17406	390	2	62.8	7e-16	gb|ACV65039.1|	3-hydroxy-3-methylglutaryl coenzyme A synthase [Salvia miltiorrhiza]	121	3e-24	gb|FJ785326.1|	Salvia miltiorrhiza 3-hydroxy-3-methylglutaryl coenzyme A synthase mRNA, complete cds	62.8	7e-16	tr|D3U6C3|D3U6C3_SALMI	3-hydroxy-3-methylglutaryl coenzyme A synthase OS=Salvia miltiorrhiza PE=2 SV=1	/	/	/	/	/	53.9	4e-13	pop:POPTR_646543	hypothetical protein; K01641 hydroxymethylglutaryl-CoA synthase [EC:2.3.3.10]	map00072;map00900;map00650;map00280	Synthesis and degradation of ketone bodies;Terpenoid backbone biosynthesis;Butanoate metabolism;Valine, leucine and isoleucine degradation	lipid biosynthetic process;cellular lipid metabolic process;isoprenoid metabolic process;isoprenoid biosynthetic process;	/	transferase activity, transferring acyl groups, acyl groups converted into alkyl on transfer;
	Contig2867	Unigene_17406	543	13	171	1e-84	gb|ACV65039.1|	3-hydroxy-3-methylglutaryl coenzyme A synthase [Salvia miltiorrhiza]	535	1e-149	gb|FJ785326.1|	Salvia miltiorrhiza 3-hydroxy-3-methylglutaryl coenzyme A synthase mRNA, complete cds	171	1e-84	tr|D3U6C3|D3U6C3_SALMI	3-hydroxy-3-methylglutaryl coenzyme A synthase OS=Salvia miltiorrhiza PE=2 SV=1	108	5e-33	YML126c	COG3425	3-hydroxy-3-methylglutaryl CoA synthase	165	3e-82	ath:AT4G11820	MVA1; MVA1 (HYDROXYMETHYLGLUTARYL-COA SYNTHASE); acetyl-CoA C-acetyltransferase/ hydroxymethylglutaryl-CoA synthase ; K01641 hydroxymethylglutaryl-CoA synthase [EC:2.3.3.10]	map00072;map00900;map00650;map00280	Synthesis and degradation of ketone bodies;Terpenoid backbone biosynthesis;Butanoate metabolism;Valine, leucine and isoleucine degradation	lipid biosynthetic process;cellular lipid metabolic process;isoprenoid metabolic process;isoprenoid biosynthetic process;	/	transferase activity, transferring acyl groups, acyl groups converted into alkyl on transfer;
	Contig8401	Unigene_17406	338	5	169	7e-41	gb|ACV65039.1|	3-hydroxy-3-methylglutaryl coenzyme A synthase [Salvia miltiorrhiza]	200	4e-48	gb|FJ785326.1|	Salvia miltiorrhiza 3-hydroxy-3-methylglutaryl coenzyme A synthase mRNA, complete cds	169	7e-41	tr|D3U6C3|D3U6C3_SALMI	3-hydroxy-3-methylglutaryl coenzyme A synthase OS=Salvia miltiorrhiza PE=2 SV=1	53.1	2e-07	YML126c	COG3425	3-hydroxy-3-methylglutaryl CoA synthase	167	1e-40	ath:AT4G11820	MVA1; MVA1 (HYDROXYMETHYLGLUTARYL-COA SYNTHASE); acetyl-CoA C-acetyltransferase/ hydroxymethylglutaryl-CoA synthase ; K01641 hydroxymethylglutaryl-CoA synthase [EC:2.3.3.10]	map00072;map00900;map00650;map00280	Synthesis and degradation of ketone bodies;Terpenoid backbone biosynthesis;Butanoate metabolism;Valine, leucine and isoleucine degradation	lipid biosynthetic process;cellular lipid metabolic process;isoprenoid metabolic process;isoprenoid biosynthetic process;	/	transferase activity, transferring acyl groups, acyl groups converted into alkyl on transfer;
	Contig12553	Unigene_17406	237	3	120	5e-26	gb|ACV65039.1|	3-hydroxy-3-methylglutaryl coenzyme A synthase [Salvia miltiorrhiza]	250	3e-63	gb|FJ785326.1|	Salvia miltiorrhiza 3-hydroxy-3-methylglutaryl coenzyme A synthase mRNA, complete cds	120	5e-26	tr|D3U6C3|D3U6C3_SALMI	3-hydroxy-3-methylglutaryl coenzyme A synthase OS=Salvia miltiorrhiza PE=2 SV=1	79	3e-15	SPAC4F8.14c	COG3425	3-hydroxy-3-methylglutaryl CoA synthase	118	1e-25	zma:100272824	hypothetical protein LOC100272824	/	/	lipid biosynthetic process;cellular lipid metabolic process;isoprenoid metabolic process;isoprenoid biosynthetic process;	/	transferase activity, transferring acyl groups, acyl groups converted into alkyl on transfer;
	Contig12993	Unigene_18923	180	2	97.4	5e-19	gb|ABB45811.1|	HMG-CoA synthase [Salvia miltiorrhiza]	182	4e-43	gb|DQ243700.1|	Salvia miltiorrhiza HMG-CoA synthase mRNA, partial cds	97.4	5e-19	tr|Q306J7|Q306J7_SALMI	HMG-CoA synthase (Fragment) OS=Salvia miltiorrhiza PE=2 SV=1	56.2	2e-08	YML126c	COG3425	3-hydroxy-3-methylglutaryl CoA synthase	93.2	4e-18	rcu:RCOM_1683050	hydroxymethylglutaryl-CoA synthase, putative (EC:2.3.3.10); K01641 hydroxymethylglutaryl-CoA synthase [EC:2.3.3.10]	map00072;map00900;map00650;map00280	Synthesis and degradation of ketone bodies;Terpenoid backbone biosynthesis;Butanoate metabolism;Valine, leucine and isoleucine degradation	lipid biosynthetic process;cellular lipid metabolic process;isoprenoid metabolic process;isoprenoid biosynthetic process;	/	transferase activity, transferring acyl groups, acyl groups converted into alkyl on transfer;
	Contig19562	Unigene_17406	447	3	192	1e-47	gb|ACV65039.1|	3-hydroxy-3-methylglutaryl coenzyme A synthase [Salvia miltiorrhiza]	274	4e-70	gb|FJ785326.1|	Salvia miltiorrhiza 3-hydroxy-3-methylglutaryl coenzyme A synthase mRNA, complete cds	192	1e-47	tr|D3U6C3|D3U6C3_SALMI	3-hydroxy-3-methylglutaryl coenzyme A synthase OS=Salvia miltiorrhiza PE=2 SV=1	112	3e-25	YML126c	COG3425	3-hydroxy-3-methylglutaryl CoA synthase	184	1e-45	vvi:100244379	GSVIVT00001077001; hypothetical protein LOC100244379; K01641 hydroxymethylglutaryl-CoA synthase [EC:2.3.3.10]	map00072;map00900;map00650;map00280	Synthesis and degradation of ketone bodies;Terpenoid backbone biosynthesis;Butanoate metabolism;Valine, leucine and isoleucine degradation	lipid biosynthetic process;cellular lipid metabolic process;isoprenoid metabolic process;isoprenoid biosynthetic process;	/	transferase activity, transferring acyl groups, acyl groups converted into alkyl on transfer;
	GLRWUMC01AH3R6	Unigene_3540	153	1	/	/	/	/	89.7	4e-15	gb|FJ785326.1|	Salvia miltiorrhiza 3-hydroxy-3-methylglutaryl coenzyme A synthase mRNA, complete cds	/	/	/	/	/	/	/	/	/	/	/	/	/	/	/	/	/	/
	GLRWUMC01AMX1N	Unigene_18923	223	1	95.5	4e-25	gb|ABB45811.1|	HMG-CoA synthase [Salvia miltiorrhiza]	141	2e-30	gb|DQ243700.1|	Salvia miltiorrhiza HMG-CoA synthase mRNA, partial cds	95.5	4e-25	tr|Q306J7|Q306J7_SALMI	HMG-CoA synthase (Fragment) OS=Salvia miltiorrhiza PE=2 SV=1	33.9	6e-06	YML126c	COG3425	3-hydroxy-3-methylglutaryl CoA synthase	84	5e-21	sbi:SORBI_01g049310	SORBIDRAFT_01g049310; hypothetical protein ; K01641 hydroxymethylglutaryl-CoA synthase [EC:2.3.3.10]	map00072;map00900;map00650;map00280	Synthesis and degradation of ketone bodies;Terpenoid backbone biosynthesis;Butanoate metabolism;Valine, leucine and isoleucine degradation	lipid biosynthetic process;cellular lipid metabolic process;isoprenoid metabolic process;isoprenoid biosynthetic process;	/	transferase activity, transferring acyl groups, acyl groups converted into alkyl on transfer;
	GLRWUMC01AL96N	Unigene_18923	130	1	79.7	1e-13	gb|ABB45811.1|	HMG-CoA synthase [Salvia miltiorrhiza]	121	1e-24	gb|FJ785326.1|	Salvia miltiorrhiza 3-hydroxy-3-methylglutaryl coenzyme A synthase mRNA, complete cds	79.7	1e-13	tr|Q306J7|Q306J7_SALMI	HMG-CoA synthase (Fragment) OS=Salvia miltiorrhiza PE=2 SV=1	/	/	/	/	/	73.2	5e-12	rcu:RCOM_1683050	hydroxymethylglutaryl-CoA synthase, putative (EC:2.3.3.10); K01641 hydroxymethylglutaryl-CoA synthase [EC:2.3.3.10]	map00072;map00900;map00650;map00280	Synthesis and degradation of ketone bodies;Terpenoid backbone biosynthesis;Butanoate metabolism;Valine, leucine and isoleucine degradation	lipid biosynthetic process;cellular lipid metabolic process;isoprenoid metabolic process;isoprenoid biosynthetic process;	/	transferase activity, transferring acyl groups, acyl groups converted into alkyl on transfer;
	GLRWUMC01CEP2S	Unigene_7166	110	1	58.9	7e-10	gb|ACD87446.1|	3-hydroxy-3-methylglutaryl-CoA synthase [Camptotheca acuminata]	111	8e-22	gb|EU677841.1|	Camptotheca acuminata 3-hydroxy-3-methylglutaryl-CoA synthase mRNA, complete cds	58.9	7e-10	tr|B3GDB1|B3GDB1_CAMAC	3-hydroxy-3-methylglutaryl-CoA synthase OS=Camptotheca acuminata PE=2 SV=1	50.8	8e-07	YML126c	COG3425	3-hydroxy-3-methylglutaryl CoA synthase	58.9	3e-10	pop:POPTR_548531	hypothetical protein; K01641 hydroxymethylglutaryl-CoA synthase [EC:2.3.3.10]	map00072;map00900;map00650;map00280	Synthesis and degradation of ketone bodies;Terpenoid backbone biosynthesis;Butanoate metabolism;Valine, leucine and isoleucine degradation	lipid biosynthetic process;cellular lipid metabolic process;isoprenoid metabolic process;isoprenoid biosynthetic process;	/	transferase activity, transferring acyl groups, acyl groups converted into alkyl on transfer;transferase activity, transferring acyl groups other than amino-acyl groups;
1.1.1.34	Contig1093	Unigene_7680	743	20	176	3e-64	sp|P48021.1|HMDH_CAMAC	RecName: Full=3-hydroxy-3-methylglutaryl-coenzyme A reductase; Short=HMG-CoA reductase gb|AAA33040.1| 3-hydroxy-3-methylglutaryl coA reductase [Camptotheca acuminata]	172	2e-39	gb|AY429658.1|	Andrographis paniculata 3-hydroxy-3-methylglutaryl-coenzyme A reductase (hmgr1) gene, complete cds	176	3e-64	sp|P48021|HMDH_CAMAC	3-hydroxy-3-methylglutaryl-coenzyme A reductase OS=Camptotheca acuminata PE=3 SV=1	71.2	2e-12	YML075c	COG1257	Hydroxymethylglutaryl-CoA reductase	155	3e-57	pop:POPTR_820962	hypothetical protein	/	/	lipid biosynthetic process;cellular lipid metabolic process;nucleobase, nucleoside and nucleotide metabolic process;isoprenoid metabolic process;isoprenoid biosynthetic process;coenzyme metabolic process;	integral to membrane;intracellular organelle;intracellular membrane-bounded organelle;intrinsic to membrane;cytoplasmic part;membrane part;intracellular organelle part;cytoplasm;endoplasmic reticulum membrane;endoplasmic reticulum;organelle membrane;intracellular part;nuclear envelope-endoplasmic reticulum network;endoplasmic reticulum part;	NADP or NADPH binding;oxidoreductase activity, acting on the CH-OH group of donors, NAD or NADP as acceptor;
	Contig1977	Unigene_7680	317	4	156	7e-37	sp|P48021.1|HMDH_CAMAC	RecName: Full=3-hydroxy-3-methylglutaryl-coenzyme A reductase; Short=HMG-CoA reductase gb|AAA33040.1| 3-hydroxy-3-methylglutaryl coA reductase [Camptotheca acuminata]	216	6e-53	gb|EF666139.1|	Antirrhinum majus 3-hydroxy-3-methylglutaryl-coenzyme A reductase (HMGR1) mRNA, complete cds	156	6e-37	sp|P48021|HMDH_CAMAC	3-hydroxy-3-methylglutaryl-coenzyme A reductase OS=Camptotheca acuminata PE=3 SV=1	105	4e-23	YLR450w	COG1257	Hydroxymethylglutaryl-CoA reductase	150	2e-35	vvi:100245191	GSVIVT00036301001; hypothetical protein LOC100245191	/	/	lipid biosynthetic process;cellular lipid metabolic process;nucleobase, nucleoside and nucleotide metabolic process;isoprenoid metabolic process;isoprenoid biosynthetic process;coenzyme metabolic process;	integral to membrane;intracellular organelle;intracellular membrane-bounded organelle;intrinsic to membrane;cytoplasmic part;membrane part;intracellular organelle part;cytoplasm;endoplasmic reticulum membrane;endoplasmic reticulum;organelle membrane;intracellular part;nuclear envelope-endoplasmic reticulum network;endoplasmic reticulum part;	NADP or NADPH binding;oxidoreductase activity, acting on the CH-OH group of donors, NAD or NADP as acceptor;
	Contig3551	Unigene_7680	430	3	108	2e-22	sp|P48021.1|HMDH_CAMAC	RecName: Full=3-hydroxy-3-methylglutaryl-coenzyme A reductase; Short=HMG-CoA reductase gb|AAA33040.1| 3-hydroxy-3-methylglutaryl coA reductase [Camptotheca acuminata]	168	2e-38	gb|EF666139.1|	Antirrhinum majus 3-hydroxy-3-methylglutaryl-coenzyme A reductase (HMGR1) mRNA, complete cds	108	2e-22	sp|P48021|HMDH_CAMAC	3-hydroxy-3-methylglutaryl-coenzyme A reductase OS=Camptotheca acuminata PE=3 SV=1	66.6	2e-11	YML075c	COG1257	Hydroxymethylglutaryl-CoA reductase	104	2e-21	vvi:100245191	GSVIVT00036301001; hypothetical protein LOC100245191	/	/	lipid biosynthetic process;cellular lipid metabolic process;nucleobase, nucleoside and nucleotide metabolic process;isoprenoid metabolic process;isoprenoid biosynthetic process;coenzyme metabolic process;	integral to membrane;intracellular organelle;intracellular membrane-bounded organelle;intrinsic to membrane;cytoplasmic part;membrane part;intracellular organelle part;cytoplasm;endoplasmic reticulum membrane;endoplasmic reticulum;organelle membrane;intracellular part;nuclear envelope-endoplasmic reticulum network;endoplasmic reticulum part;	NADP or NADPH binding;oxidoreductase activity, acting on the CH-OH group of donors, NAD or NADP as acceptor;
	Contig5874	Unigene_7680	680	129	213	1e-53	sp|P48021.1|HMDH_CAMAC	RecName: Full=3-hydroxy-3-methylglutaryl-coenzyme A reductase; Short=HMG-CoA reductase gb|AAA33040.1| 3-hydroxy-3-methylglutaryl coA reductase [Camptotheca acuminata]	331	3e-87	gb|EF666139.1|	Antirrhinum majus 3-hydroxy-3-methylglutaryl-coenzyme A reductase (HMGR1) mRNA, complete cds	213	1e-53	sp|P48021|HMDH_CAMAC	3-hydroxy-3-methylglutaryl-coenzyme A reductase OS=Camptotheca acuminata PE=3 SV=1	132	7e-31	YML075c	COG1257	Hydroxymethylglutaryl-CoA reductase	207	3e-52	vvi:100245191	GSVIVT00036301001; hypothetical protein LOC100245191	/	/	lipid biosynthetic process;cellular lipid metabolic process;nucleobase, nucleoside and nucleotide metabolic process;isoprenoid metabolic process;isoprenoid biosynthetic process;coenzyme metabolic process;	integral to membrane;intracellular organelle;intracellular membrane-bounded organelle;intrinsic to membrane;cytoplasmic part;membrane part;intracellular organelle part;cytoplasm;endoplasmic reticulum membrane;endoplasmic reticulum;organelle membrane;intracellular part;nuclear envelope-endoplasmic reticulum network;endoplasmic reticulum part;	NADP or NADPH binding;oxidoreductase activity, acting on the CH-OH group of donors, NAD or NADP as acceptor;
	Contig7603	Unigene_9763	464	6	58.2	3e-07	gb|ABV25900.1|	3-hydroxy-3-methylglutaryl-coenzyme A reductase [Antirrhinum majus]	97.6	6e-17	gb|EF666139.1|	Antirrhinum majus 3-hydroxy-3-methylglutaryl-coenzyme A reductase (HMGR1) mRNA, complete cds	58.2	3e-07	tr|B6C864|B6C864_ANTMA	3-hydroxy-3-methylglutaryl-coenzyme A reductase OS=Antirrhinum majus GN=HMGR1 PE=2 SV=1	/	/	/	/	/	56.6	5e-07	vvi:100245191	GSVIVT00036301001; hypothetical protein LOC100245191	/	/	lipid biosynthetic process;cellular lipid metabolic process;nucleobase, nucleoside and nucleotide metabolic process;isoprenoid metabolic process;isoprenoid biosynthetic process;coenzyme metabolic process;	integral to membrane;intrinsic to membrane;membrane part;	NADP or NADPH binding;oxidoreductase activity, acting on the CH-OH group of donors, NAD or NADP as acceptor;
	Contig8521	Unigene_936	380	2	71.6	3e-11	gb|ACD37361.1|	3-hydroxy-3-methylglutaryl-coenzyme A reductase [Salvia miltiorrhiza]	165	2e-37	gb|AY254389.2|	Andrographis paniculata 3-hydroxy-3-methylglutaryl-coenzyme A reductase (HMGR2) mRNA, complete cds	71.6	3e-11	tr|B3V4Z5|B3V4Z5_SALMI	3-hydroxy-3-methylglutaryl-coenzyme A reductase OS=Salvia miltiorrhiza PE=2 SV=1	/	/	/	/	/	57.8	2e-07	rcu:RCOM_1602200	hmg-CoA reductase, putative (EC:1.1.1.34)	/	/	lipid biosynthetic process;cellular lipid metabolic process;nucleobase, nucleoside and nucleotide metabolic process;isoprenoid metabolic process;isoprenoid biosynthetic process;coenzyme metabolic process;	integral to membrane;intrinsic to membrane;membrane part;	NADP or NADPH binding;oxidoreductase activity, acting on the CH-OH group of donors, NAD or NADP as acceptor;
	Contig11827	Unigene_936	307	2	131	3e-29	gb|ACD37361.1|	3-hydroxy-3-methylglutaryl-coenzyme A reductase [Salvia miltiorrhiza]	165	2e-37	gb|EU680958.1|	Salvia miltiorrhiza 3-hydroxy-3-methylglutaryl-coenzyme A reductase mRNA, complete cds	131	3e-29	tr|B3V4Z5|B3V4Z5_SALMI	3-hydroxy-3-methylglutaryl-coenzyme A reductase OS=Salvia miltiorrhiza PE=2 SV=1	/	/	/	/	/	88.6	1e-16	vvi:100265082	hypothetical protein LOC100265082	/	/	lipid biosynthetic process;cellular lipid metabolic process;nucleobase, nucleoside and nucleotide metabolic process;isoprenoid metabolic process;isoprenoid biosynthetic process;coenzyme metabolic process;	integral to membrane;intrinsic to membrane;membrane part;	NADP or NADPH binding;oxidoreductase activity, acting on the CH-OH group of donors, NAD or NADP as acceptor;
	Contig12378	Unigene_6899	214	4	79	2e-14	gb|AAO85554.1|	3-hydroxy-3-methylglutaryl-CoA reductase [Nicotiana attenuata]	172	5e-40	ref|XM_002514354.1|	Ricinus communis hmg-CoA reductase, putative, mRNA	79	2e-14	tr|Q8GTA8|Q8GTA8_TOBAC	Hydroxy-methyl-glutaryl-coenzyme A reductase OS=Nicotiana tabacum GN=HMGR2 PE=2 SV=1	50.8	8e-07	YML075c	COG1257	Hydroxymethylglutaryl-CoA reductase	78.6	2e-14	vvi:100245191	GSVIVT00036301001; hypothetical protein LOC100245191	/	/	lipid biosynthetic process;cellular lipid metabolic process;nucleobase, nucleoside and nucleotide metabolic process;isoprenoid metabolic process;isoprenoid biosynthetic process;coenzyme metabolic process;	integral to membrane;intrinsic to membrane;membrane part;	NADP or NADPH binding;oxidoreductase activity, acting on the CH-OH group of donors, NAD or NADP as acceptor;
	Contig15936	Unigene_8523	555	11	160	7e-78	gb|AAL28015.2|AF389879_1	3-hydroxy-3-methylglutaryl-coenzyme A reductase [Andrographis paniculata] gb|AAR03707.1| 3-hydroxy-3-methylglutaryl-coenzyme A reductase [Andrographis paniculata]	424	1e-115	gb|EF666139.1|	Antirrhinum majus 3-hydroxy-3-methylglutaryl-coenzyme A reductase (HMGR1) mRNA, complete cds	160	6e-78	tr|Q946J7|Q946J7_ANDPA	3-hydroxy-3-methylglutaryl-coenzyme A reductase OS=Andrographis paniculata GN=HMGR1 PE=2 SV=2	107	4e-46	YML075c	COG1257	Hydroxymethylglutaryl-CoA reductase	162	7e-39	rcu:RCOM_1602200	hmg-CoA reductase, putative (EC:1.1.1.34)	/	/	lipid biosynthetic process;cellular lipid metabolic process;nucleobase, nucleoside and nucleotide metabolic process;isoprenoid metabolic process;isoprenoid biosynthetic process;coenzyme metabolic process;	integral to membrane;intrinsic to membrane;membrane part;	NADP or NADPH binding;oxidoreductase activity, acting on the CH-OH group of donors, NAD or NADP as acceptor;
	GLRWUMC01DXFFE	Unigene_21296	137	1	84.7	3e-15	gb|ABV25902.1|	3-hydroxy-3-methylglutaryl-coenzyme A reductase [Antirrhinum majus]	137	2e-29	gb|EF666141.1|	Antirrhinum majus 3-hydroxy-3-methylglutaryl-coenzyme A reductase (HMGR3) mRNA, complete cds	84.7	3e-15	tr|B6C866|B6C866_ANTMA	3-hydroxy-3-methylglutaryl-coenzyme A reductase OS=Antirrhinum majus GN=HMGR3 PE=2 SV=1	/	/	/	/	/	80.9	2e-14	pop:POPTR_831722	hypothetical protein	/	/	lipid biosynthetic process;cellular lipid metabolic process;nucleobase, nucleoside and nucleotide metabolic process;isoprenoid metabolic process;isoprenoid biosynthetic process;coenzyme metabolic process;	integral to membrane;intrinsic to membrane;membrane part;	NADP or NADPH binding;oxidoreductase activity, acting on the CH-OH group of donors, NAD or NADP as acceptor;
	GLRWUMC01A8JM3	Unigene_15320	293	1	/	/	/	/	71.9	8e-10	gb|EF666139.1|	Antirrhinum majus 3-hydroxy-3-methylglutaryl-coenzyme A reductase (HMGR1) mRNA, complete cds	/	/	/	/	/	/	/	/	/	/	/	/	/	/	/	/	/	/
	GLRWUMC01AYS7Y	Unigene_11047	361	1	/	/	/	/	71.9	8e-18	gb|EU680958.1|	Salvia miltiorrhiza 3-hydroxy-3-methylglutaryl-coenzyme A reductase mRNA, complete cds	/	/	/	/	/	/	/	/	/	/	/	/	/	/	/	/	/	/
	GLRWUMC01B00C6	Unigene_12040	133	1	81.6	3e-14	gb|AAB69727.1|	3-hydroxy-3-methylglutaryl coenzyme A reductase [Camptotheca acuminata]	157	2e-35	gb|EF666139.1|	Antirrhinum majus 3-hydroxy-3-methylglutaryl-coenzyme A reductase (HMGR1) mRNA, complete cds	81.6	3e-14	tr|P93081|P93081_CAMAC	3-hydroxy-3-methylglutaryl coenzyme A reductase OS=Camptotheca acuminata PE=3 SV=1	67.8	6e-12	YML075c	COG1257	Hydroxymethylglutaryl-CoA reductase	80.9	2e-14	pop:POPTR_595031	hypothetical protein	/	/	lipid biosynthetic process;cellular lipid metabolic process;nucleobase, nucleoside and nucleotide metabolic process;isoprenoid metabolic process;isoprenoid biosynthetic process;coenzyme metabolic process;	integral to membrane;intrinsic to membrane;membrane part;	NADP or NADPH binding;oxidoreductase activity, acting on the CH-OH group of donors, NAD or NADP as acceptor;
2.7.1.36	Contig14036	Unigene_3278	563	8	142	1e-32	gb|AAL18925.1|AF429384_1	mevalonate kinase [Hevea brasiliensis] dbj|BAF98283.1| mevalonate kinase [Hevea brasiliensis]	101	4e-18	ref|XM_002284777.1|	PREDICTED: Vitis vinifera hypothetical protein LOC100251148 (LOC100251148), mRNA	142	1e-32	tr|Q944G2|Q944G2_HEVBR	Mevalonate kinase OS=Hevea brasiliensis GN=HbMVK PE=2 SV=1	50.8	2e-06	SPAC13G6.11c	COG1577	Mevalonate kinase	141	2e-32	pop:POPTR_729638	hypothetical protein; K00869 mevalonate kinase [EC:2.7.1.36]	map00900	Terpenoid backbone biosynthesis	lipid biosynthetic process;cellular lipid metabolic process;phosphate metabolic process;isoprenoid metabolic process;isoprenoid biosynthetic process;	cytoplasm;intracellular part;	purine ribonucleotide binding;adenyl nucleotide binding;kinase activity;phosphotransferase activity, alcohol group as acceptor;
	Contig17421	Unigene_6503	251	5	150	4e-35	gb|ABV02026.1|	mevalonate kinase [Nicotiana langsdorffii x Nicotiana sanderae]	145	1e-31	gb|EF636814.1|	Nicotiana langsdorffii x Nicotiana sanderae mevalonate kinase mRNA, partial cds	150	4e-35	tr|B3F8H3|B3F8H3_NICLS	Mevalonate kinase (Fragment) OS=Nicotiana langsdorffii x Nicotiana sanderae PE=2 SV=1	60.1	1e-09	SPAC13G6.11c	COG1577	Mevalonate kinase	142	8e-33	pop:POPTR_729638	hypothetical protein; K00869 mevalonate kinase [EC:2.7.1.36]	map00900	Terpenoid backbone biosynthesis	lipid biosynthetic process;cellular lipid metabolic process;phosphate metabolic process;isoprenoid metabolic process;isoprenoid biosynthetic process;	cytoplasm;intracellular part;	purine ribonucleotide binding;adenyl nucleotide binding;kinase activity;phosphotransferase activity, alcohol group as acceptor;
	GLRWUMC01CPPO7	Unigene_23610	194	1	75.1	3e-12	gb|ACU18472.1|	unknown [Glycine max]	83.8	3e-13	dbj|AK324936.1|	Solanum lycopersicum cDNA, clone: LEFL1088DB10, HTC in leaf	75.1	2e-12	tr|C6T9H0|C6T9H0_SOYBN	Putative uncharacterized protein OS=Glycine max PE=2 SV=1	44.7	6e-05	PAB0372	COG1577	Mevalonate kinase	73.6	4e-12	ath:AT5G27450	MK/MVK; MK/MVK; mevalonate kinase ; K00869 mevalonate kinase [EC:2.7.1.36]	map00900	Terpenoid backbone biosynthesis	lipid biosynthetic process;cellular lipid metabolic process;phosphate metabolic process;isoprenoid metabolic process;isoprenoid biosynthetic process;	cytoplasm;intracellular part;	purine ribonucleotide binding;adenyl nucleotide binding;kinase activity;phosphotransferase activity, alcohol group as acceptor;
2.7.4.2	GLRWUMC01B13WR	Unigene_17090	418	1	89	2e-16	dbj|BAF98284.1|	5-phosphomevelonate kinase [Hevea brasiliensis]	/	/	/	/	89	2e-16	tr|A9ZN02|A9ZN02_HEVBR	5-phosphomevelonate kinase OS=Hevea brasiliensis GN=HbMVD PE=2 SV=1	/	/	/	/	/	86.3	5e-16	pop:POPTR_712033	hypothetical protein; K00938 phosphomevalonate kinase [EC:2.7.4.2]	map00900	Terpenoid backbone biosynthesis	phosphate metabolic process;	/	phosphotransferase activity, phosphate group as acceptor;purine ribonucleotide binding;adenyl nucleotide binding;kinase activity;
	GLRWUMC01AYJAU	Unigene_17669	406	1	73.6	7e-12	ref|XP_002275808.1|	PREDICTED: hypothetical protein [Vitis vinifera] emb|CBI33805.1| unnamed protein product [Vitis vinifera]	67.9	4e-08	dbj|AK321446.1|	Solanum lycopersicum cDNA, clone: LEFL1024DD08, HTC in leaf	73.6	7e-12	tr|A5BLG4|A5BLG4_VITVI	Putative uncharacterized protein OS=Vitis vinifera GN=VITISV_005973 PE=3 SV=1	/	/	/	/	/	73.6	4e-12	vvi:100242124	hypothetical protein LOC100242124; K00938 phosphomevalonate kinase [EC:2.7.4.2]	map00900	Terpenoid backbone biosynthesis	phosphate metabolic process;	/	purine ribonucleotide binding;adenyl nucleotide binding;kinase activity;
4.1.1.33	Contig701	Unigene_5686	432	3	177	2e-56	ref|XP_002521172.1|	diphosphomevalonate decarboxylase, putative [Ricinus communis] gb|EEF41203.1| diphosphomevalonate decarboxylase, putative [Ricinus communis]	85.7	2e-13	ref|XM_002452935.1|	Sorghum bicolor hypothetical protein, mRNA	177	4e-43	tr|Q944G0|Q944G0_HEVBR	Mevalonate disphosphate decarboxylase OS=Hevea brasiliensis PE=2 SV=1	95.1	5e-20	YNR043w	COG3407	Mevalonate pyrophosphate decarboxylase	177	2e-43	rcu:RCOM_0888230	diphosphomevalonate decarboxylase, putative (EC:4.1.1.33); K01597 diphosphomevalonate decarboxylase [EC:4.1.1.33]	map00900	Terpenoid backbone biosynthesis	lipid biosynthetic process;cellular lipid metabolic process;phosphate metabolic process;isoprenoid metabolic process;isoprenoid biosynthetic process;	/	purine ribonucleotide binding;carboxy-lyase activity;adenyl nucleotide binding;kinase activity;
	Contig6218	Unigene_19761	336	7	160	3e-38	gb|ABV02028.1|	mevalonate diphosphate decarboxylase [Nicotiana langsdorffii x Nicotiana sanderae]	159	1e-35	ref|XM_002266363.1|	PREDICTED: Vitis vinifera hypothetical protein LOC100251686 (LOC100251686), mRNA	160	3e-38	tr|B3F8H5|B3F8H5_NICLS	Mevalonate diphosphate decarboxylase (Fragment) OS=Nicotiana langsdorffii x Nicotiana sanderae PE=2 SV=1	73.2	2e-13	YNR043w	COG3407	Mevalonate pyrophosphate decarboxylase	160	2e-38	rcu:RCOM_0888230	diphosphomevalonate decarboxylase, putative (EC:4.1.1.33); K01597 diphosphomevalonate decarboxylase [EC:4.1.1.33]	map00900	Terpenoid backbone biosynthesis	lipid biosynthetic process;cellular lipid metabolic process;phosphate metabolic process;isoprenoid metabolic process;isoprenoid biosynthetic process;	/	purine ribonucleotide binding;carboxy-lyase activity;adenyl nucleotide binding;kinase activity;
	Contig13845	Unigene_19761	325	3	149	1e-34	gb|ABV02028.1|	mevalonate diphosphate decarboxylase [Nicotiana langsdorffii x Nicotiana sanderae]	107	4e-20	ref|XM_002266363.1|	PREDICTED: Vitis vinifera hypothetical protein LOC100251686 (LOC100251686), mRNA	149	1e-34	tr|B3F8H5|B3F8H5_NICLS	Mevalonate diphosphate decarboxylase (Fragment) OS=Nicotiana langsdorffii x Nicotiana sanderae PE=2 SV=1	62.8	2e-10	YNR043w	COG3407	Mevalonate pyrophosphate decarboxylase	148	1e-34	vvi:100251686	hypothetical protein LOC100251686; K01597 diphosphomevalonate decarboxylase [EC:4.1.1.33]	map00900	Terpenoid backbone biosynthesis	lipid biosynthetic process;cellular lipid metabolic process;phosphate metabolic process;isoprenoid metabolic process;isoprenoid biosynthetic process;	/	purine ribonucleotide binding;carboxy-lyase activity;adenyl nucleotide binding;kinase activity;
	Contig11976	Unigene_19761	256	2	153	6e-36	gb|ABV02028.1|	mevalonate diphosphate decarboxylase [Nicotiana langsdorffii x Nicotiana sanderae]	212	7e-52	ref|XM_002266363.1|	PREDICTED: Vitis vinifera hypothetical protein LOC100251686 (LOC100251686), mRNA	153	5e-36	tr|B3F8H5|B3F8H5_NICLS	Mevalonate diphosphate decarboxylase (Fragment) OS=Nicotiana langsdorffii x Nicotiana sanderae PE=2 SV=1	82.8	2e-16	SPAC24C9.03	COG3407	Mevalonate pyrophosphate decarboxylase	153	4e-36	vvi:100251686	hypothetical protein LOC100251686; K01597 diphosphomevalonate decarboxylase [EC:4.1.1.33]	map00900	Terpenoid backbone biosynthesis	lipid biosynthetic process;cellular lipid metabolic process;phosphate metabolic process;isoprenoid metabolic process;isoprenoid biosynthetic process;	/	purine ribonucleotide binding;carboxy-lyase activity;adenyl nucleotide binding;kinase activity;
	GLRWUMC01APFOT	Unigene_2241	306	1	125	2e-27	ref|XP_002266399.1|	PREDICTED: hypothetical protein [Vitis vinifera] emb|CBI35263.1| unnamed protein product [Vitis vinifera]	176	5e-41	ref|XM_002266363.1|	PREDICTED: Vitis vinifera hypothetical protein LOC100251686 (LOC100251686), mRNA	124	3e-27	tr|Q8LAR8|Q8LAR8_ARATH	Diphosphomevalonate decarboxylase-like protein OS=Arabidopsis thaliana GN=At3g54250 PE=2 SV=1	67	1e-11	SPAC24C9.03	COG3407	Mevalonate pyrophosphate decarboxylase	125	1e-27	vvi:100251686	hypothetical protein LOC100251686; K01597 diphosphomevalonate decarboxylase [EC:4.1.1.33]	map00900	Terpenoid backbone biosynthesis	/	/	/
	GLRWUMC01CBEGE	Unigene_2241	159	1	69.3	2e-17	ref|XP_002266399.1|	PREDICTED: hypothetical protein [Vitis vinifera] emb|CBI35263.1| unnamed protein product [Vitis vinifera]	151	1e-33	gb|GQ455989.2|	Panax ginseng mevalonate diphosphate decarboxylase (MVD) mRNA, complete cds	68.9	3e-17	tr|A8WBX7|A8WBX7_SOLLC	Mevalonate disphosphate decarboxylase OS=Solanum lycopersicum GN=MDC PE=2 SV=1	41.2	3e-08	SPAC24C9.03	COG3407	Mevalonate pyrophosphate decarboxylase	69.3	6e-18	vvi:100251686	hypothetical protein LOC100251686; K01597 diphosphomevalonate decarboxylase [EC:4.1.1.33]	map00900	Terpenoid backbone biosynthesis	lipid biosynthetic process;cellular lipid metabolic process;phosphate metabolic process;isoprenoid metabolic process;isoprenoid biosynthetic process;	/	purine ribonucleotide binding;carboxy-lyase activity;adenyl nucleotide binding;kinase activity;
	GLRWUMC01ER53F	Unigene_5686	243	1	110	3e-26	ref|XP_002521172.1|	diphosphomevalonate decarboxylase, putative [Ricinus communis] gb|EEF41203.1| diphosphomevalonate decarboxylase, putative [Ricinus communis]	194	2e-46	ref|XM_002315405.1|	Populus trichocarpa predicted protein, mRNA	110	3e-26	tr|B9S5A3|B9S5A3_RICCO	Diphosphomevalonate decarboxylase, putative OS=Ricinus communis GN=RCOM_0888230 PE=4 SV=1	63.9	9e-11	YNR043w	COG3407	Mevalonate pyrophosphate decarboxylase	110	2e-26	rcu:RCOM_0888230	diphosphomevalonate decarboxylase, putative (EC:4.1.1.33); K01597 diphosphomevalonate decarboxylase [EC:4.1.1.33]	map00900	Terpenoid backbone biosynthesis	lipid biosynthetic process;cellular lipid metabolic process;phosphate metabolic process;isoprenoid metabolic process;isoprenoid biosynthetic process;	/	purine ribonucleotide binding;carboxy-lyase activity;adenyl nucleotide binding;kinase activity;
	GLRWUMC01DKPYH	Unigene_5686	330	1	63.9	6e-09	ref|XP_002521172.1|	diphosphomevalonate decarboxylase, putative [Ricinus communis] gb|EEF41203.1| diphosphomevalonate decarboxylase, putative [Ricinus communis]	56	0.0001	ref|XM_002521126.1|	Ricinus communis diphosphomevalonate decarboxylase, putative, mRNA	63.9	6e-09	tr|B9S5A3|B9S5A3_RICCO	Diphosphomevalonate decarboxylase, putative OS=Ricinus communis GN=RCOM_0888230 PE=4 SV=1	/	/	/	/	/	63.9	3e-09	rcu:RCOM_0888230	diphosphomevalonate decarboxylase, putative (EC:4.1.1.33); K01597 diphosphomevalonate decarboxylase [EC:4.1.1.33]	map00900	Terpenoid backbone biosynthesis	lipid biosynthetic process;cellular lipid metabolic process;phosphate metabolic process;isoprenoid metabolic process;isoprenoid biosynthetic process;	/	purine ribonucleotide binding;carboxy-lyase activity;adenyl nucleotide binding;kinase activity;
2.2.1.7	Contig7918	Unigene_21265	262	3	77.4	5e-13	emb|CAA09804.2|	1-deoxyxylulose 5-phosphate synthase [Catharanthus roseus]	67.9	3e-08	gb|FJ214107.1|	Stevia rebaudiana 1-deoxy-D-xylulose 5-phosphate synthase mRNA, complete cds	77.4	5e-13	tr|O82676|O82676_CATRO	1-deoxyxylulose 5-phosphate synthase OS=Catharanthus roseus PE=2 SV=2	/	/	/	/	/	69.7	5e-11	sbi:SORBI_02g005410	SORBIDRAFT_02g005410; hypothetical protein	/	/	lipid biosynthetic process;vitamin biosynthetic process;cellular lipid metabolic process;thiamin and derivative metabolic process;terpenoid biosynthetic process;isoprenoid metabolic process;isoprenoid biosynthetic process;water-soluble vitamin metabolic process;sulfur compound biosynthetic process;	/	oxidoreductase activity, acting on the aldehyde or oxo group of donors, disulfide as acceptor;1-deoxy-D-xylulose-5-phosphate synthase activity;
	Contig16835	Unigene_2088	554	6	156	9e-37	ref|NP_196699.1|	DXPS3 (1-deoxy-D-xylulose 5-phosphate synthase 3); 1-deoxy-D-xylulose-5-phosphate synthase [Arabidopsis thaliana] emb|CAB96673.1| 1-D-deoxyxylulose 5-phosphate synthase-like protein [Arabidopsis thaliana]	79.8	2e-11	ref|XM_002324241.1|	Populus trichocarpa predicted protein, mRNA	156	9e-37	tr|Q9LFL9|Q9LFL9_ARATH	1-D-deoxyxylulose 5-phosphate synthase-like protein OS=Arabidopsis thaliana GN=F2I11_270 PE=4 SV=1	89.7	3e-18	AGc1351	COG1154	Deoxyxylulose-5-phosphate synthase	155	1e-36	pop:POPTR_737131	hypothetical protein	/	/	/	/	/
	GLRWUMC01BX1QW	Unigene_5348	105	1	53.5	8e-06	gb|ABV02017.1|	1-deoxy-D-xylulose-5-phosphate synthase [Nicotiana langsdorffii x Nicotiana sanderae]	69.9	2e-09	gb|FJ883018.2|	Bacopa monnieri 1-deoxy-D-xylulose-5-phosphate synthase (DXS) mRNA, partial cds	53.5	8e-06	tr|B3F8G4|B3F8G4_NICLS	1-deoxy-D-xylulose-5-phosphate synthase (Fragment) OS=Nicotiana langsdorffii x Nicotiana sanderae PE=2 SV=1	/	/	/	/	/	46.2	0.0006	rcu:RCOM_0025610	1-deoxyxylulose-5-phosphate synthase, putative (EC:2.2.1.7); K01662 1-deoxy-D-xylulose-5-phosphate synthase [EC:2.2.1.7]	map00900	Terpenoid backbone biosynthesis	/	/	/
	GLRWUMC01DP0O6	Unigene_12852	171	1	93.2	9e-18	dbj|BAF98289.1|	1-deoxy-D-xylulose 5-phosphate synthase [Hevea brasiliensis]	81.8	1e-12	dbj|AB294699.1|	Hevea brasiliensis HbDXS2 mRNA for 1-deoxy-D-xylulose 5-phosphate synthase, complete cds, note: HbDXS2_No.1902	93.2	9e-18	tr|A9ZN07|A9ZN07_HEVBR	1-deoxy-D-xylulose 5-phosphate synthase OS=Hevea brasiliensis GN=HbDXS2 PE=2 SV=1	57.8	7e-09	BMEI1498	COG1154	Deoxyxylulose-5-phosphate synthase	89	8e-17	vvi:100268079	hypothetical protein LOC100268079; K01662 1-deoxy-D-xylulose-5-phosphate synthase [EC:2.2.1.7]	map00900	Terpenoid backbone biosynthesis	lipid biosynthetic process;vitamin biosynthetic process;cellular lipid metabolic process;thiamin and derivative metabolic process;terpenoid biosynthetic process;isoprenoid metabolic process;isoprenoid biosynthetic process;water-soluble vitamin metabolic process;sulfur compound biosynthetic process;	/	oxidoreductase activity, acting on the aldehyde or oxo group of donors, disulfide as acceptor;1-deoxy-D-xylulose-5-phosphate synthase activity;
	GLRWUMC01AKFN0	Unigene_12333	256	1	68.2	1e-21	gb|AAL32062.1|AF443590_1	deoxy-D-xylulose-5-phosphate synthase [Morinda citrifolia]	151	2e-33	ref|XM_002266889.1|	PREDICTED: Vitis vinifera hypothetical protein LOC100268079 (LOC100268079), mRNA	68.2	1e-21	tr|Q8W4V1|Q8W4V1_MORCI	Deoxy-D-xylulose-5-phosphate synthase OS=Morinda citrifolia GN=DXS PE=2 SV=1	50.1	2e-10	BMEI1498	COG1154	Deoxyxylulose-5-phosphate synthase	66.6	1e-21	vvi:100268079	hypothetical protein LOC100268079; K01662 1-deoxy-D-xylulose-5-phosphate synthase [EC:2.2.1.7]	map00900	Terpenoid backbone biosynthesis	lipid biosynthetic process;vitamin biosynthetic process;cellular lipid metabolic process;thiamin and derivative metabolic process;terpenoid biosynthetic process;isoprenoid metabolic process;isoprenoid biosynthetic process;water-soluble vitamin metabolic process;sulfur compound biosynthetic process;	/	oxidoreductase activity, acting on the aldehyde or oxo group of donors, disulfide as acceptor;1-deoxy-D-xylulose-5-phosphate synthase activity;
	GLRWUMC01BHEHT	Unigene_10433	137	1	63.5	8e-09	ref|XP_002324277.1|	predicted protein [Populus trichocarpa] gb|EEF02842.1| predicted protein [Populus trichocarpa]	56	5e-05	gb|EZ188331.1|	TSA: Artemisia annua strain Artemis Contig1888, mRNA sequence	63.5	7e-09	tr|B9IKT7|B9IKT7_POPTR	Predicted protein OS=Populus trichocarpa GN=POPTRDRAFT_737131 PE=4 SV=1	46.2	2e-05	sll1945	COG1154	Deoxyxylulose-5-phosphate synthase	63.5	4e-09	pop:POPTR_737131	hypothetical protein	/	/	/	/	/
1.1.1.267	Contig1462	Unigene_9112	703	2	316	2e-84	dbj|BAF98290.1|	1-deoxy-D-xylulose-5-phosphate reductoisomerase [Hevea brasiliensis]	458	1e-125	gb|AY770406.1|	Antirrhinum majus 1-deoxy-D-xylulose-5-phosphate reductoisomerase (DXR) mRNA, complete cds	316	2e-84	tr|Q0GYS3|Q0GYS3_HEVBR	1-deoxy-D-xylulose 5-phosphate reductoisomerase OS=Hevea brasiliensis GN=DXR PE=2 SV=1	200	3e-51	alr4351	COG0743	1-deoxy-D-xylulose 5-phosphate reductoisomerase	314	3e-84	vvi:100248516	GSVIVT00016085001; hypothetical protein LOC100248516; K00099 1-deoxy-D-xylulose-5-phosphate reductoisomerase [EC:1.1.1.267]	map00900	Terpenoid backbone biosynthesis	lipid biosynthetic process;cellular lipid metabolic process;terpenoid biosynthetic process;isoprenoid metabolic process;isoprenoid biosynthetic process;	/	oxidoreductase activity, acting on the CH-OH group of donors, NAD or NADP as acceptor;metal ion binding;
	Contig6394	Unigene_14080	362	4	157	4e-49	ref|NP_001105139.1|	dxr protein [Zea mays] emb|CAC03581.1| putative 1-deoxy-D-xylulose 5-phosphate reductoisomerase [Zea mays] gb|ACG33012.1| 1-deoxy-D-xylulose 5-phosphate reductoisomerase [Zea mays]	385	1e-103	gb|AY770406.1|	Antirrhinum majus 1-deoxy-D-xylulose-5-phosphate reductoisomerase (DXR) mRNA, complete cds	157	4e-49	tr|Q9FXZ7|Q9FXZ7_MAIZE	1-deoxy-D-xylulose 5-phosphate reductoisomerase OS=Zea mays GN=dxr PE=2 SV=1	132	4e-43	sll0019	COG0743	1-deoxy-D-xylulose 5-phosphate reductoisomerase	157	2e-49	zma:542023	IDP154; dxr protein	/	/	lipid biosynthetic process;cellular lipid metabolic process;terpenoid biosynthetic process;isoprenoid metabolic process;isoprenoid biosynthetic process;	/	oxidoreductase activity, acting on the CH-OH group of donors, NAD or NADP as acceptor;metal ion binding;
	Contig7046	Unigene_9112	517	26	111	4e-23	dbj|BAF98290.1|	1-deoxy-D-xylulose-5-phosphate reductoisomerase [Hevea brasiliensis]	101	4e-18	gb|AY770406.1|	Antirrhinum majus 1-deoxy-D-xylulose-5-phosphate reductoisomerase (DXR) mRNA, complete cds	111	3e-23	tr|Q0GYS3|Q0GYS3_HEVBR	1-deoxy-D-xylulose 5-phosphate reductoisomerase OS=Hevea brasiliensis GN=DXR PE=2 SV=1	49.3	4e-06	alr4351	COG0743	1-deoxy-D-xylulose 5-phosphate reductoisomerase	109	7e-23	rcu:RCOM_1510580	1-deoxy-D-xylulose 5-phosphate reductoisomerase, chloroplast precursor, putative (EC:1.1.1.267); K00099 1-deoxy-D-xylulose-5-phosphate reductoisomerase [EC:1.1.1.267]	map00900	Terpenoid backbone biosynthesis	lipid biosynthetic process;cellular lipid metabolic process;terpenoid biosynthetic process;isoprenoid metabolic process;isoprenoid biosynthetic process;	/	oxidoreductase activity, acting on the CH-OH group of donors, NAD or NADP as acceptor;metal ion binding;
	Contig7071	Unigene_2017	367	2	71.2	4e-11	gb|AAY87151.2|	1-deoxy-D-xylulose 5-phosphate reductoisomerase [Rauvolfia verticillata]	129	1e-26	gb|FJ476255.1|	Salvia miltiorrhiza 1-deoxy-d-xylulose 5-phosphate reductoisomerase mRNA, complete cds	71.2	4e-11	tr|Q1L7P3|Q1L7P3_9GENT	1-deoxy-D-xylulose 5-phosphate reductoisomerase OS=Rauvolfia verticillata PE=2 SV=2	/	/	/	/	/	45.8	0.0008	pop:POPTR_728585	hypothetical protein; K00099 1-deoxy-D-xylulose-5-phosphate reductoisomerase [EC:1.1.1.267]	map00900	Terpenoid backbone biosynthesis	lipid biosynthetic process;cellular lipid metabolic process;terpenoid biosynthetic process;isoprenoid metabolic process;isoprenoid biosynthetic process;	/	oxidoreductase activity, acting on the CH-OH group of donors, NAD or NADP as acceptor;metal ion binding;
	GLRWUMC01B6IXJ	Unigene_9112	338	1	111	3e-23	dbj|BAF98290.1|	1-deoxy-D-xylulose-5-phosphate reductoisomerase [Hevea brasiliensis]	101	3e-18	gb|AY770406.1|	Antirrhinum majus 1-deoxy-D-xylulose-5-phosphate reductoisomerase (DXR) mRNA, complete cds	111	3e-23	tr|Q0GYS3|Q0GYS3_HEVBR	1-deoxy-D-xylulose 5-phosphate reductoisomerase OS=Hevea brasiliensis GN=DXR PE=2 SV=1	49.3	2e-06	alr4351	COG0743	1-deoxy-D-xylulose 5-phosphate reductoisomerase	109	6e-23	rcu:RCOM_1510580	1-deoxy-D-xylulose 5-phosphate reductoisomerase, chloroplast precursor, putative (EC:1.1.1.267); K00099 1-deoxy-D-xylulose-5-phosphate reductoisomerase [EC:1.1.1.267]	map00900	Terpenoid backbone biosynthesis	lipid biosynthetic process;cellular lipid metabolic process;terpenoid biosynthetic process;isoprenoid metabolic process;isoprenoid biosynthetic process;	/	oxidoreductase activity, acting on the CH-OH group of donors, NAD or NADP as acceptor;metal ion binding;
	GLRWUMC01CL6RS	Unigene_11064	357	1	167	3e-42	gb|ACR57217.1|	1-deoxy-d-xylulose 5-phosphate reductoisomerase [Salvia miltiorrhiza]	295	9e-77	gb|FJ476255.1|	Salvia miltiorrhiza 1-deoxy-d-xylulose 5-phosphate reductoisomerase mRNA, complete cds	167	3e-42	tr|C5I7T8|C5I7T8_SALMI	1-deoxy-d-xylulose 5-phosphate reductoisomerase OS=Salvia miltiorrhiza PE=2 SV=1	87.4	8e-18	alr4351	COG0743	1-deoxy-D-xylulose 5-phosphate reductoisomerase	169	5e-42	rcu:RCOM_1510580	1-deoxy-D-xylulose 5-phosphate reductoisomerase, chloroplast precursor, putative (EC:1.1.1.267); K00099 1-deoxy-D-xylulose-5-phosphate reductoisomerase [EC:1.1.1.267]	map00900	Terpenoid backbone biosynthesis	lipid biosynthetic process;cellular lipid metabolic process;terpenoid biosynthetic process;isoprenoid metabolic process;isoprenoid biosynthetic process;	/	oxidoreductase activity, acting on the CH-OH group of donors, NAD or NADP as acceptor;metal ion binding;
2.7.7.60	GLRWUMC01DDQLM	Unigene_831	166	1	112	2e-23	gb|ABB88837.2|	4-diphosphocytidyl-2-C-methyl-D-erythritol synthase [Stevia rebaudiana]	161	1e-36	gb|DQ269452.4|	Stevia rebaudiana 4-diphosphocytidyl-2-C-methyl-D-erythritol synthase mRNA, complete cds	112	2e-23	tr|Q2I6K0|Q2I6K0_STERE	4-diphosphocytidyl-2-C-methyl-D-erythritol synthase OS=Stevia rebaudiana PE=2 SV=2	45.1	4e-05	lin0267	COG1211	4-diphosphocytidyl-2-methyl-D-erithritol synthase	108	1e-22	pop:POPTR_1113320	hypothetical protein; K00991 2-C-methyl-D-erythritol 4-phosphate cytidylyltransferase [EC:2.7.7.60]	map00900	Terpenoid backbone biosynthesis	lipid biosynthetic process;cellular lipid metabolic process;terpenoid biosynthetic process;isoprenoid metabolic process;isoprenoid biosynthetic process;	/	nucleotidyltransferase activity;
2.7.1.148	Contig631	Unigene_22281	378	2	84.3	4e-15	dbj|BAF98293.1|	4-(cytidine 5'-diphospho)-2-C-methyl-D-erythritol kinase [Hevea brasiliensis] gb|ACI26723.1| 4-diphosphocytidyl-2C-methyl-D-erythritol kinase [Hevea brasiliensis]	/	/	/	/	84.3	4e-15	tr|A9ZN11|A9ZN11_HEVBR	4-(Cytidine 5'-diphospho)-2-C-methyl-D-erythritol kinase OS=Hevea brasiliensis GN=HbCMK PE=2 SV=1	/	/	/	/	/	81.6	1e-14	rcu:RCOM_0784670	4-diphosphocytidyl-2-C-methyl-d-erythritol kinase, putative (EC:2.7.1.148); K00919 4-diphosphocytidyl-2-C-methyl-D-erythritol kinase [EC:2.7.1.148]	map00900	Terpenoid backbone biosynthesis	lipid biosynthetic process;cellular lipid metabolic process;phosphate metabolic process;terpenoid biosynthetic process;isoprenoid metabolic process;isoprenoid biosynthetic process;	/	purine ribonucleotide binding;adenyl nucleotide binding;kinase activity;phosphotransferase activity, alcohol group as acceptor;
4.6.1.12	GLRWUMC01APU1Q	Unigene_14916	293	1	48.9	0.0002	ref|XP_002452756.1|	hypothetical protein SORBIDRAFT_04g031830 [Sorghum bicolor] gb|EES05732.1| hypothetical protein SORBIDRAFT_04g031830 [Sorghum bicolor]	75.8	1e-10	gb|AF250236.1|AF250236	Catharanthus roseus 2C-methyl-D-erythritol 2,4-cyclodiphosphate synthase (MECS) mRNA, complete cds	48.9	0.0002	tr|Q6EPN6|Q6EPN6_ORYSJ	2-C-methyl-D-erythritol 2,4-cyclodiphosphate synthase OS=Oryza sativa subsp. japonica GN=P0663F07.27 PE=3 SV=1	/	/	/	/	/	48.9	9e-05	zma:100276918	hypothetical protein LOC100276918	/	/	/	/	/
	GLRWUMC01B0U4S	Unigene_21875	161	1	93.2	9e-18	gb|ACU14519.1|	unknown [Glycine max]	91.7	1e-15	gb|GU828010.1|	Ageratina adenophora 2C-methyl-D-erythritol 2,4-cyclodiphosphate synthase (ispF1) mRNA, complete cds	93.2	9e-18	tr|C6SZ46|C6SZ46_SOYBN	2-C-methyl-D-erythritol 2,4-cyclodiphosphate synthase OS=Glycine max PE=2 SV=1	55.1	4e-08	DR0230	COG0245	2C-methyl-D-erythritol 2,4-cyclodiphosphate synthase	90.9	2e-17	vvi:100250076	hypothetical protein LOC100250076; K01770 2-C-methyl-D-erythritol 2,4-cyclodiphosphate synthase [EC:4.6.1.12]	map00900	Terpenoid backbone biosynthesis	lipid biosynthetic process;cellular lipid metabolic process;terpenoid biosynthetic process;isoprenoid metabolic process;isoprenoid biosynthetic process;	/	2-C-methyl-D-erythritol 2,4-cyclodiphosphate synthase activity;
	GLRWUMC01DJKT9	Unigene_15055	217	1	89.7	1e-21	gb|ABV02020.1|	2-C-methyl-D-erythritol 2,4-cyclodiphosphate synthase [Nicotiana langsdorffii x Nicotiana sanderae]	119	7e-24	dbj|AK246318.1|	Solanum lycopersicum cDNA, clone: FC06CG07, HTC in fruit	89.7	1e-21	tr|B3F8G7|B3F8G7_NICLS	2-C-methyl-D-erythritol 2,4-cyclodiphosphate synthase (Fragment) OS=Nicotiana langsdorffii x Nicotiana sanderae PE=2 SV=1	52	4e-07	RSc1644	COG0245	2C-methyl-D-erythritol 2,4-cyclodiphosphate synthase	87.8	2e-21	rcu:RCOM_1688570	2-C-methyl-D-erythritol 2,4-cyclodiphosphate synthase, putative (EC:4.6.1.12)	/	/	lipid biosynthetic process;cellular lipid metabolic process;terpenoid biosynthetic process;isoprenoid metabolic process;isoprenoid biosynthetic process;	/	2-C-methyl-D-erythritol 2,4-cyclodiphosphate synthase activity;
	GLRWUMC01AKYW2	Unigene_17627	278	1	/	/	/	/	77.8	3e-11	gb|AF250236.1|AF250236	Catharanthus roseus 2C-methyl-D-erythritol 2,4-cyclodiphosphate synthase (MECS) mRNA, complete cds	/	/	/	/	/	/	/	/	/	/	/	/	/	/	/	/	/	/
1.17.7.1	Contig11061	Unigene_15419	268	2	51.6	3e-17	gb|AAS75817.1|	(E)-4-hydroxy-3-methylbut-2-enyl diphosphate synthase [Nicotiana benthamiana]	168	1e-38	ref|XM_002328259.1|	Populus trichocarpa predicted protein, mRNA	51.6	3e-17	tr|Q6RI20|Q6RI20_NICBE	(E)-4-hydroxy-3-methylbut-2-enyl diphosphate synthase (Fragment) OS=Nicotiana benthamiana PE=2 SV=1	/	/	/	/	/	51.2	1e-14	sbi:SORBI_04g025290	SORBIDRAFT_04g025290; hypothetical protein ; K03526 (E)-4-hydroxy-3-methylbut-2-enyl-diphosphate synthase [EC:1.17.7.1]	map00900	Terpenoid backbone biosynthesis	lipid biosynthetic process;cellular lipid metabolic process;terpenoid biosynthetic process;isoprenoid metabolic process;isoprenoid biosynthetic process;	/	oxidoreductase activity, acting on CH or CH2 groups, disulfide as acceptor;
	Contig15561	Unigene_16016	246	3	155	1e-36	ref|XP_002285130.1|	PREDICTED: hypothetical protein [Vitis vinifera] emb|CBI16309.1| unnamed protein product [Vitis vinifera]	184	2e-43	dbj|AK321669.1|	Solanum lycopersicum cDNA, clone: LEFL1027BH09, HTC in leaf	155	1e-36	tr|A5BBY6|A5BBY6_VITVI	Putative uncharacterized protein OS=Vitis vinifera GN=VITISV_005654 PE=3 SV=1	100	1e-21	CPn0373	COG0821	Enzyme involved in the deoxyxylulose pathway of isoprenoid biosynthesis	155	5e-37	vvi:100257071	GSVIVT00024531001; hypothetical protein LOC100257071; K03526 (E)-4-hydroxy-3-methylbut-2-enyl-diphosphate synthase [EC:1.17.7.1]	map00900	Terpenoid backbone biosynthesis	lipid biosynthetic process;cellular lipid metabolic process;terpenoid biosynthetic process;isoprenoid metabolic process;isoprenoid biosynthetic process;	/	metal ion binding;oxidoreductase activity, acting on CH or CH2 groups, disulfide as acceptor;
	GLRWUMC01BQCCD	Unigene_16730	423	1	181	2e-44	gb|ACT64770.1|	(E)-4-hydroxy-3-methylbut-2-enyl diphosphate synthase [Artemisia annua]	147	6e-32	dbj|AK321669.1|	Solanum lycopersicum cDNA, clone: LEFL1027BH09, HTC in leaf	181	2e-44	tr|D2D5E3|D2D5E3_ARTAN	(E)-4-hydroxy-3-methylbut-2-enyl diphosphate synthase OS=Artemisia annua GN=HDS PE=2 SV=1	/	/	/	/	/	179	4e-44	vvi:100257071	GSVIVT00024531001; hypothetical protein LOC100257071; K03526 (E)-4-hydroxy-3-methylbut-2-enyl-diphosphate synthase [EC:1.17.7.1]	map00900	Terpenoid backbone biosynthesis	lipid biosynthetic process;cellular lipid metabolic process;terpenoid biosynthetic process;isoprenoid metabolic process;isoprenoid biosynthetic process;	/	metal ion binding;oxidoreductase activity, acting on CH or CH2 groups, disulfide as acceptor;
	GLRWUMC01C1CU6	Unigene_10073	385	1	125	2e-27	ref|XP_002328295.1|	predicted protein [Populus trichocarpa] gb|EEE76175.1| predicted protein [Populus trichocarpa]	143	9e-31	ref|XM_002285094.1|	PREDICTED: Vitis vinifera hypothetical protein LOC100257071 (LOC100257071), mRNA	125	2e-27	tr|Q84PA7|Q84PA7_ORYSJ	Isoprenoid biosynthesis-like protein (Fragment) OS=Oryza sativa subsp. japonica PE=2 SV=1	/	/	/	/	/	125	1e-27	osa:4329911	Os02g0603800; hypothetical protein ; K03526 (E)-4-hydroxy-3-methylbut-2-enyl-diphosphate synthase [EC:1.17.7.1]	map00900	Terpenoid backbone biosynthesis	/	/	/
1.17.1.2	Contig11608	Unigene_10618	214	3	141	2e-32	gb|ABI30631.1|	1-hydroxy-2-methyl-butenyl 4-diphosphate reductase [Catharanthus roseus]	206	4e-50	gb|DQ252518.1|	Solanum tuberosum clone 099C12 LYTB-like protein precursor-like mRNA, complete cds	141	2e-32	tr|B4UUI9|B4UUI9_CATRO	1-hydroxy-2-methyl-butenyl 4-diphosphate reductase OS=Catharanthus roseus PE=2 SV=1	82.8	2e-16	all0985	COG0761	Penicillin tolerance protein	135	8e-31	vvi:100267479	GSVIVT00036436001; hypothetical protein LOC100267479; K03527 4-hydroxy-3-methylbut-2-enyl diphosphate reductase [EC:1.17.1.2]	map00900	Terpenoid backbone biosynthesis	lipid biosynthetic process;oxoacid metabolic process;glyceraldehyde-3-phosphate metabolic process;cellular lipid metabolic process;monosaccharide metabolic process;phospholipid biosynthetic process;phospholipid metabolic process;terpenoid biosynthetic process;isopentenyl diphosphate metabolic process;isoprenoid metabolic process;isoprenoid biosynthetic process;	/	oxidoreductase activity, acting on CH or CH2 groups, NAD or NADP as acceptor;
	GLRWUMC01EFOTN	Unigene_4674	176	1	92.8	3e-18	ref|XP_002284659.1|	PREDICTED: hypothetical protein [Vitis vinifera]	111	1e-21	gb|EF199770.1|	Picrorhiza kurrooa 4-hydroxy-3-methylbut-2-enyl diphosphate reductase (IspH) mRNA, complete cds	92.4	4e-18	tr|A3AMD8|A3AMD8_ORYSJ	Putative uncharacterized protein OS=Oryza sativa subsp. japonica GN=OsJ_12459 PE=3 SV=1	69.3	2e-12	all0985	COG0761	Penicillin tolerance protein	92.8	1e-18	vvi:100267479	GSVIVT00036436001; hypothetical protein LOC100267479; K03527 4-hydroxy-3-methylbut-2-enyl diphosphate reductase [EC:1.17.1.2]	map00900	Terpenoid backbone biosynthesis	/	/	/
	GLRWUMC01DH9F7	Unigene_4674	199	1	107	5e-24	ref|XP_002284659.1|	PREDICTED: hypothetical protein [Vitis vinifera]	198	8e-48	gb|AF514843.1|	Forsythia x intermedia LYTB-like protein (LYTB) mRNA, partial cds	104	9e-24	tr|D0VNY3|D0VNY3_SOLLC	ISPH protein OS=Solanum lycopersicum PE=2 SV=1	82.4	3e-17	slr0348	COG0761	Penicillin tolerance protein	107	3e-24	vvi:100267479	GSVIVT00036436001; hypothetical protein LOC100267479; K03527 4-hydroxy-3-methylbut-2-enyl diphosphate reductase [EC:1.17.1.2]	map00900	Terpenoid backbone biosynthesis	lipid biosynthetic process;oxoacid metabolic process;glyceraldehyde-3-phosphate metabolic process;cellular lipid metabolic process;monosaccharide metabolic process;phospholipid biosynthetic process;phospholipid metabolic process;terpenoid biosynthetic process;isopentenyl diphosphate metabolic process;isoprenoid metabolic process;isoprenoid biosynthetic process;	/	oxidoreductase activity, acting on CH or CH2 groups, NAD or NADP as acceptor;
	GLRWUMC01CWTT5	Unigene_23321	400	1	99.4	1e-19	gb|ABM89226.1|	4-hydroxy-3-methylbut-2-enyl diphosphate reductase [Picrorhiza kurrooa]	87.7	5e-14	gb|EF199770.1|	Picrorhiza kurrooa 4-hydroxy-3-methylbut-2-enyl diphosphate reductase (IspH) mRNA, complete cds	99.4	1e-19	tr|A2TGW4|A2TGW4_9LAMI	4-hydroxy-3-methylbut-2-enyl diphosphate reductase OS=Picrorhiza kurrooa GN=IspH PE=2 SV=1	41.6	0.0005	all0985	COG0761	Penicillin tolerance protein	80.9	2e-14	rcu:RCOM_0938310	4-hydroxy-3-methylbut-2-enyl diphosphate reductase, putative (EC:1.17.1.2); K03527 4-hydroxy-3-methylbut-2-enyl diphosphate reductase [EC:1.17.1.2]	map00900	Terpenoid backbone biosynthesis	lipid biosynthetic process;oxoacid metabolic process;glyceraldehyde-3-phosphate metabolic process;cellular lipid metabolic process;monosaccharide metabolic process;phospholipid biosynthetic process;phospholipid metabolic process;terpenoid biosynthetic process;isopentenyl diphosphate metabolic process;isoprenoid metabolic process;isoprenoid biosynthetic process;	/	oxidoreductase activity, acting on CH or CH2 groups, NAD or NADP as acceptor;
	GLRWUMC01DBEDZ	Unigene_10618	213	1	63.2	1e-08	gb|ABI30631.1|	1-hydroxy-2-methyl-butenyl 4-diphosphate reductase [Catharanthus roseus]	129	7e-27	gb|EU881977.1|	Hevea brasiliensis clone HaiKen 2 4-hydroxy-3-methylbut-2-enyl diphosphate reductase mRNA, complete cds	63.2	1e-08	tr|B4UUI9|B4UUI9_CATRO	1-hydroxy-2-methyl-butenyl 4-diphosphate reductase OS=Catharanthus roseus PE=2 SV=1	42.7	0.0002	all0985	COG0761	Penicillin tolerance protein	62.8	6e-09	vvi:100267479	GSVIVT00036436001; hypothetical protein LOC100267479; K03527 4-hydroxy-3-methylbut-2-enyl diphosphate reductase [EC:1.17.1.2]	map00900	Terpenoid backbone biosynthesis	lipid biosynthetic process;oxoacid metabolic process;glyceraldehyde-3-phosphate metabolic process;cellular lipid metabolic process;monosaccharide metabolic process;phospholipid biosynthetic process;phospholipid metabolic process;terpenoid biosynthetic process;isopentenyl diphosphate metabolic process;isoprenoid metabolic process;isoprenoid biosynthetic process;	/	oxidoreductase activity, acting on CH or CH2 groups, NAD or NADP as acceptor;
5.3.3.2	Contig674	Unigene_13110	344	2	214	2e-54	dbj|BAB40973.1|	isopentenyl diphosphate isomerase 1 [Nicotiana tabacum]	274	3e-70	dbj|AK339640.1|	Lotus japonicus cDNA, clone: LjFL3-042-BB01, HTC	214	2e-54	tr|Q9AVG8|Q9AVG8_TOBAC	Isopentenyl diphosphate isomerase 1 OS=Nicotiana tabacum GN=ipi1 PE=2 SV=1	111	5e-25	SPBC106.15	COG1443	Isopentenyldiphosphate isomerase	211	1e-53	vvi:100241072	hypothetical protein LOC100241072; K01823 isopentenyl-diphosphate delta-isomerase [EC:5.3.3.2]	map00900	Terpenoid backbone biosynthesis	lipid biosynthetic process;cellular lipid metabolic process;isoprenoid metabolic process;isoprenoid biosynthetic process;	/	intramolecular oxidoreductase activity, transposing C=C bonds;
	Contig4861	Unigene_6530	386	8	143	4e-39	dbj|BAC65421.1|	isopentenyl-diphosphate delta-isomerase [Periploca sepium]	192	1e-45	gb|AF031080.1|AF031080	Camptotheca acuminata isopentenyl diphosphate isomerase II (IPI2) mRNA, complete cds	143	4e-39	tr|Q84RZ8|Q84RZ8_9GENT	Isopentenyl-diphosphate delta-isomerase OS=Periploca sepium GN=P.s.IPPiso PE=2 SV=1	69.3	1e-15	YPL117c	COG1443	Isopentenyldiphosphate isomerase	137	1e-37	vvi:100241072	hypothetical protein LOC100241072; K01823 isopentenyl-diphosphate delta-isomerase [EC:5.3.3.2]	map00900	Terpenoid backbone biosynthesis	lipid biosynthetic process;cellular lipid metabolic process;isoprenoid metabolic process;isoprenoid biosynthetic process;	/	intramolecular oxidoreductase activity, transposing C=C bonds;
	Contig12429	Unigene_14937	365	3	196	7e-49	dbj|BAI47570.1|	isopentenyl diphosphate isomerase [Ipomoea sp. Kenyan]	226	7e-56	dbj|AB049816.1|	Nicotiana tabacum ipi2 mRNA for isopentenyl diphosphate isomerase 2, complete cds	196	7e-49	tr|D0FZ24|D0FZ24_9ASTE	Isopentenyl diphosphate isomerase OS=Ipomoea sp. Kenyan GN=IPI PE=2 SV=1	81.3	6e-16	SPBC106.15	COG1443	Isopentenyldiphosphate isomerase	189	3e-47	vvi:100241072	hypothetical protein LOC100241072; K01823 isopentenyl-diphosphate delta-isomerase [EC:5.3.3.2]	map00900	Terpenoid backbone biosynthesis	lipid biosynthetic process;cellular lipid metabolic process;isoprenoid metabolic process;isoprenoid biosynthetic process;	/	intramolecular oxidoreductase activity, transposing C=C bonds;
	GLRWUMC01EDKUR	Unigene_14937	149	1	82.8	1e-14	dbj|BAI47570.1|	isopentenyl diphosphate isomerase [Ipomoea sp. Kenyan]	145	8e-32	gb|EF421829.1|	Picrorhiza kurrooa isopentyl pyrophosphate isomerase mRNA, complete cds; chloroplast	82.8	1e-14	tr|D0FZ24|D0FZ24_9ASTE	Isopentenyl diphosphate isomerase OS=Ipomoea sp. Kenyan GN=IPI PE=2 SV=1	/	/	/	/	/	79.7	5e-14	ath:AT5G16440	IPP1; IPP1 (ISOPENTENYL DIPHOSPHATE ISOMERASE 1); isopentenyl-diphosphate delta-isomerase ; K01823 isopentenyl-diphosphate delta-isomerase [EC:5.3.3.2]	map00900	Terpenoid backbone biosynthesis	lipid biosynthetic process;cellular lipid metabolic process;isoprenoid metabolic process;isoprenoid biosynthetic process;	/	intramolecular oxidoreductase activity, transposing C=C bonds;
	GLRWUMC01ARSJV	Unigene_12997	158	1	89.7	2e-17	gb|ABI13583.1|	plastid isopentenyl diphosphate isomerase [Camptotheca acuminata]	71.9	1e-09	gb|DQ212769.1|	Nicotiana langsdorffii x Nicotiana sanderae clone 011D05 isopentenyl pyrophosphate isomerase (ipi1) mRNA, complete cds	89.7	2e-17	tr|Q0MW34|Q0MW34_CAMAC	Plastid isopentenyl diphosphate isomerase OS=Camptotheca acuminata GN=IPI2 PE=2 SV=1	50.8	5e-07	SPBC106.15	COG1443	Isopentenyldiphosphate isomerase	88.6	2e-17	osa:4343523	Os07g0546000; hypothetical protein ; K01823 isopentenyl-diphosphate delta-isomerase [EC:5.3.3.2]	map00900	Terpenoid backbone biosynthesis	lipid biosynthetic process;cellular lipid metabolic process;isoprenoid metabolic process;isoprenoid biosynthetic process;	/	intramolecular oxidoreductase activity, transposing C=C bonds;
	GLRWUMC01D7L80	Unigene_13386	187	1	128	3e-28	gb|ABX55779.1|	isopentenyl diphosphate isomerase [Solanum lycopersicum]	184	1e-43	dbj|AB049816.1|	Nicotiana tabacum ipi2 mRNA for isopentenyl diphosphate isomerase 2, complete cds	128	2e-28	tr|A9LRT7|A9LRT7_SOLLC	Isopentenyl diphosphate isomerase OS=Solanum lycopersicum GN=IPI PE=2 SV=1	57.8	7e-09	SPBC106.15	COG1443	Isopentenyldiphosphate isomerase	124	1e-27	pop:POPTR_809590	hypothetical protein; K01823 isopentenyl-diphosphate delta-isomerase [EC:5.3.3.2]	map00900	Terpenoid backbone biosynthesis	lipid biosynthetic process;cellular lipid metabolic process;isoprenoid metabolic process;isoprenoid biosynthetic process;	/	intramolecular oxidoreductase activity, transposing C=C bonds;
	GLRWUMC01DWZIM	Unigene_9760	86	1	54.3	5e-06	gb|ABO14800.1|	isopentyl pyrophosphate isomerase [Picrorhiza kurrooa]	83.8	1e-13	ref|XM_002514802.1|	Ricinus communis isopentenyl-diphosphate delta isomerase, putative, mRNA	54.3	5e-06	tr|A3RKG6|A3RKG6_9LAMI	Isopentyl pyrophosphate isomerase OS=Picrorhiza kurrooa PE=2 SV=1	/	/	/	/	/	52.8	7e-06	osa:4343523	Os07g0546000; hypothetical protein ; K01823 isopentenyl-diphosphate delta-isomerase [EC:5.3.3.2]	map00900	Terpenoid backbone biosynthesis	lipid biosynthetic process;cellular lipid metabolic process;isoprenoid metabolic process;isoprenoid biosynthetic process;	plastid;intracellular organelle;intracellular membrane-bounded organelle;cytoplasmic part;cytoplasm;intracellular part;	intramolecular oxidoreductase activity, transposing C=C bonds;
2.5.1.10	Contig8108	Unigene_19527	724	13	441	1e-123	gb|AAK63847.1|AF384040_1	farnesyl diphosphate synthase [Mentha x piperita]	739	0	gb|AF384040.1|AF384040	Mentha x piperita farnesyl diphosphate synthase mRNA, complete cds	441	1e-123	tr|Q94F74|Q94F74_MENPI	Farnesyl diphosphate synthase OS=Mentha piperita PE=2 SV=1	248	9e-66	YJL167w	COG0142	Geranylgeranyl pyrophosphate synthase	422	1e-117	vvi:100232975	GSVIVT00033429001; farnesyl diphosphate synthase	/	/	lipid biosynthetic process;cellular lipid metabolic process;isoprenoid metabolic process;isoprenoid biosynthetic process;	/	/
	Contig20014	Unigene_19527	192	2	58.5	2e-07	gb|AAK63847.1|AF384040_1	farnesyl diphosphate synthase [Mentha x piperita]	89.7	5e-15	gb|AF384040.1|AF384040	Mentha x piperita farnesyl diphosphate synthase mRNA, complete cds	58.5	2e-07	tr|Q94F74|Q94F74_MENPI	Farnesyl diphosphate synthase OS=Mentha piperita PE=2 SV=1	/	/	/	/	/	/	/	/	/	/	/	lipid biosynthetic process;cellular lipid metabolic process;isoprenoid metabolic process;isoprenoid biosynthetic process;	/	/
	Contig21413	Unigene_15338	142	2	53.1	1e-10	ref|XP_002308751.1|	predicted protein [Populus trichocarpa] gb|EEE92274.1| predicted protein [Populus trichocarpa]	149	5e-33	gb|AF384040.1|AF384040	Mentha x piperita farnesyl diphosphate synthase mRNA, complete cds	53.1	1e-10	tr|B9HC16|B9HC16_POPTR	Predicted protein OS=Populus trichocarpa GN=POPTRDRAFT_560081 PE=3 SV=1	/	/	/	/	/	53.1	6e-11	pop:POPTR_560081	hypothetical protein	/	/	lipid biosynthetic process;cellular lipid metabolic process;isoprenoid metabolic process;isoprenoid biosynthetic process;	/	/
	GLRWUMC01A2CVF	Unigene_22946	142	1	103	9e-21	gb|ABY90139.1|	farnesyl diphosphate synthase [Bupleurum chinense]	129	4e-27	gb|DQ087959.1|	Panax ginseng farnesyl diphosphate synthase (FPS) mRNA, complete cds	103	9e-21	tr|B0ZSP2|B0ZSP2_BUPCH	Farnesyl diphosphate synthase (Fragment) OS=Bupleurum chinense GN=FPS PE=2 SV=1	63.2	2e-10	YJL167w	COG0142	Geranylgeranyl pyrophosphate synthase	96.3	5e-19	ath:AT5G47770	FPS1; FPS1 (FARNESYL DIPHOSPHATE SYNTHASE 1); dimethylallyltranstransferase/ geranyltranstransferase ; K00787 dimethylallyltranstransferase [EC:2.5.1.1]; K00795 geranyltranstransferase [EC:2.5.1.10]	map00900	Terpenoid backbone biosynthesis	lipid biosynthetic process;cellular lipid metabolic process;isoprenoid metabolic process;isoprenoid biosynthetic process;	/	/
	GLRWUMC01EOJIN	Unigene_19527	86	1	49.3	1e-05	gb|AAK63847.1|AF384040_1	farnesyl diphosphate synthase [Mentha x piperita]	91.7	5e-16	gb|AF384040.1|AF384040	Mentha x piperita farnesyl diphosphate synthase mRNA, complete cds	49.3	0.0001	tr|Q94F74|Q94F74_MENPI	Farnesyl diphosphate synthase OS=Mentha piperita PE=2 SV=1	/	/	/	/	/	47.8	0.0002	vvi:100232975	GSVIVT00033429001; farnesyl diphosphate synthase	/	/	lipid biosynthetic process;cellular lipid metabolic process;isoprenoid metabolic process;isoprenoid biosynthetic process;	/	/
2.5.1.1	Contig17725	Unigene_19334	327	2	137	4e-31	gb|AAS82860.1|	geranyl diphosphate synthase large subunit [Antirrhinum majus]	157	5e-35	gb|U15778.1|LAU15778	Lupinus albus geranylgeranyl pyrophosphate synthase (ggps1) mRNA, complete cds	137	4e-31	tr|Q6QLV1|Q6QLV1_ANTMA	Geranyl diphosphate synthase large subunit OS=Antirrhinum majus PE=2 SV=1	65.5	3e-11	alr0213	COG0142	Geranylgeranyl pyrophosphate synthase	126	4e-28	rcu:RCOM_0553150	geranyl geranyl pyrophosphate synthase, putative (EC:1.3.1.74); K00795 geranyltranstransferase [EC:2.5.1.10]	map00900	Terpenoid backbone biosynthesis	lipid biosynthetic process;cellular lipid metabolic process;isoprenoid metabolic process;isoprenoid biosynthetic process;	/	prenyltransferase activity;
	GLRWUMC01AL3AR	Unigene_19334	115	1	74.3	4e-12	gb|AAS82860.1|	geranyl diphosphate synthase large subunit [Antirrhinum majus]	97.6	1e-17	emb|X92893.1|	C.roseus GGPP synthase gene	74.3	4e-12	tr|Q6QLV1|Q6QLV1_ANTMA	Geranyl diphosphate synthase large subunit OS=Antirrhinum majus PE=2 SV=1	48.9	3e-06	alr0213	COG0142	Geranylgeranyl pyrophosphate synthase	65.9	8e-10	ath:AT3G20160	geranylgeranyl pyrophosphate synthase, putative / GGPP synthetase, putative / farnesyltranstransferase, putative ; K00795 geranyltranstransferase [EC:2.5.1.10]	map00900	Terpenoid backbone biosynthesis	lipid biosynthetic process;cellular lipid metabolic process;isoprenoid metabolic process;isoprenoid biosynthetic process;	/	prenyltransferase activity;
1.3.1.74	Contig1814	Unigene_21627	431	6	187	3e-46	dbj|BAI47571.1|	geranylgeranyl pyrophosphate synthase [Ipomoea sp. Kenyan]	117	6e-23	gb|EF426461.1|	Mentha haplocalyx var. piperascens geranyl pyrophosphate synthase large subunit mRNA, complete cds	187	3e-46	tr|D0FZ25|D0FZ25_9ASTE	Geranylgeranyl pyrophosphate synthase OS=Ipomoea sp. Kenyan GN=GGPS PE=2 SV=1	151	4e-37	slr0739	COG0142	Geranylgeranyl pyrophosphate synthase	184	1e-45	vvi:100266842	GSVIVT00025000001; hypothetical protein LOC100266842; K00795 geranyltranstransferase [EC:2.5.1.10]	map00900	Terpenoid backbone biosynthesis	lipid biosynthetic process;cellular lipid metabolic process;isoprenoid metabolic process;isoprenoid biosynthetic process;	/	/
	Contig6256	Unigene_9171	472	4	111	2e-23	gb|ADD82422.1|	geranylgeranyl diphosphate synthase [Jatropha curcas]	141	4e-30	ref|XM_002525050.1|	Ricinus communis geranyl geranyl pyrophosphate synthase, putative, mRNA	110	5e-23	tr|B9SYX2|B9SYX2_RICCO	Geranyl geranyl pyrophosphate synthase, putative OS=Ricinus communis GN=RCOM_0013160 PE=3 SV=1	80.1	2e-15	alr0213	COG0142	Geranylgeranyl pyrophosphate synthase	110	3e-23	rcu:RCOM_0013160	geranyl geranyl pyrophosphate synthase, putative (EC:1.3.1.74)	/	/	lipid biosynthetic process;cellular lipid metabolic process;isoprenoid metabolic process;isoprenoid biosynthetic process;	/	oxidoreductase activity, acting on the CH-CH group of donors, NAD or NADP as acceptor;
	Contig6918	Unigene_19437	336	3	201	3e-50	emb|CBI37811.1|	unnamed protein product [Vitis vinifera]	123	7e-25	gb|EZ215968.1|	TSA: Artemisia annua Contig12979	201	3e-50	tr|A5BEV9|A5BEV9_VITVI	Putative uncharacterized protein OS=Vitis vinifera GN=VITISV_001037 PE=3 SV=1	134	6e-32	slr0739	COG0142	Geranylgeranyl pyrophosphate synthase	201	1e-50	vvi:100243139	GSVIVT00008098001; hypothetical protein LOC100243139	/	/	lipid biosynthetic process;cellular lipid metabolic process;isoprenoid metabolic process;isoprenoid biosynthetic process;	/	/
	Contig11800	Unigene_6274	322	2	174	3e-42	gb|ACJ66778.1|	geranylgeranyl diphosphate synthase [Salvia miltiorrhiza]	121	3e-24	gb|EZ222134.1|	TSA: Artemisia annua Contig19145	174	3e-42	tr|B7TCA9|B7TCA9_SALMI	Geranylgeranyl diphosphate synthase OS=Salvia miltiorrhiza GN=GGPPS PE=3 SV=1	103	1e-22	slr0739	COG0142	Geranylgeranyl pyrophosphate synthase	168	1e-40	vvi:100257359	GSVIVT00014674001; hypothetical protein LOC100257359	/	/	lipid biosynthetic process;cellular lipid metabolic process;isoprenoid metabolic process;isoprenoid biosynthetic process;	/	prenyltransferase activity;
	Contig13466	Unigene_3005	175	2	115	2e-24	ref|XP_002306207.1|	predicted protein [Populus trichocarpa] gb|EEE86718.1| predicted protein [Populus trichocarpa]	97.6	2e-17	ref|XM_002264066.1|	PREDICTED: Vitis vinifera hypothetical protein LOC100243139 (LOC100243139), mRNA	115	2e-24	tr|B9H1M5|B9H1M5_POPTR	Predicted protein OS=Populus trichocarpa GN=POPTRDRAFT_648837 PE=3 SV=1	76.6	1e-14	slr0739	COG0142	Geranylgeranyl pyrophosphate synthase	115	8e-25	pop:POPTR_648837	hypothetical protein	/	/	lipid biosynthetic process;cellular lipid metabolic process;isoprenoid metabolic process;isoprenoid biosynthetic process;	/	/
	GLRWUMC01AYUSU	Unigene_14039	383	1	116	8e-25	ref|XP_002529802.1|	geranyl geranyl pyrophosphate synthase, putative [Ricinus communis] gb|EEF32584.1| geranyl geranyl pyrophosphate synthase, putative [Ricinus communis]	65.9	2e-07	gb|EZ349417.1|	TSA: Artemisia annua strain Uganda Contig16633, mRNA sequence	116	7e-25	tr|B9SUY3|B9SUY3_RICCO	Geranyl geranyl pyrophosphate synthase, putative OS=Ricinus communis GN=RCOM_1373490 PE=3 SV=1	/	/	/	/	/	116	4e-25	rcu:RCOM_1373490	geranyl geranyl pyrophosphate synthase, putative (EC:1.3.1.74)	/	/	lipid biosynthetic process;cellular lipid metabolic process;isoprenoid metabolic process;isoprenoid biosynthetic process;	/	oxidoreductase activity, acting on the CH-CH group of donors, NAD or NADP as acceptor;
	GLRWUMC01B9C9W	Unigene_17064	195	1	100	6e-20	gb|ADD49734.1|	geranylgeranyl diphosphate synthase [Nicotiana tabacum]	83.8	3e-13	gb|FJ643617.1|	Salvia miltiorrhiza geranylgeranyl diphosphate synthase gene, complete cds	100	6e-20	tr|D3W9H8|D3W9H8_TOBAC	Geranylgeranyl diphosphate synthase OS=Nicotiana tabacum GN=GGPPS1 PE=2 SV=1	63.9	9e-11	slr0739	COG0142	Geranylgeranyl pyrophosphate synthase	90.1	4e-17	pop:POPTR_1083401	hypothetical protein	/	/	lipid biosynthetic process;cellular lipid metabolic process;isoprenoid metabolic process;isoprenoid biosynthetic process;	/	prenyltransferase activity;
	GLRWUMC01CO3TB	Unigene_16566	160	1	89.4	1e-16	gb|ACU17882.1|	unknown [Glycine max]	61.9	1e-06	dbj|AK325077.1|	Solanum lycopersicum cDNA, clone: LEFL1091AH04, HTC in leaf	89.4	1e-16	tr|C6T7T0|C6T7T0_SOYBN	Putative uncharacterized protein OS=Glycine max PE=2 SV=1	44.3	8e-05	alr0213	COG0142	Geranylgeranyl pyrophosphate synthase	88.6	1e-16	rcu:RCOM_1373490	geranyl geranyl pyrophosphate synthase, putative (EC:1.3.1.74)	/	/	lipid biosynthetic process;cellular lipid metabolic process;isoprenoid metabolic process;isoprenoid biosynthetic process;	/	/
	GLRWUMC01CGPQW	Unigene_6488	204	1	54.3	1e-08	dbj|BAF98303.1|	geranylgeranyl-diphosphate synthase [Hevea brasiliensis]	/	/	/	/	54.3	1e-08	tr|A9ZN21|A9ZN21_HEVBR	Geranylgeranyl-diphosphate synthase OS=Hevea brasiliensis GN=HbGGPS PE=2 SV=1	/	/	/	/	/	57.4	3e-07	rcu:RCOM_1373490	geranyl geranyl pyrophosphate synthase, putative (EC:1.3.1.74)	/	/	lipid biosynthetic process;cellular lipid metabolic process;isoprenoid metabolic process;isoprenoid biosynthetic process;	/	prenyltransferase activity;
3.1.7.3	Contig5255	Unigene_2133	180	2	123	9e-32	gb|ADK62524.1|	geraniol synthase [Phyla dulcis]	199	5e-48	gb|GU136162.1|	Phyla dulcis geraniol synthase (GES) mRNA, complete cds	115	2e-30	sp|Q6USK1.1|GERS_OCIBA	Geraniol synthase, chloroplastic OS=Ocimum basilicum GN=GES PE=1 SV=1	/	/	/	/	/	105	2e-21	rcu:RCOM_1764780	1,8-cineole synthase, chloroplast precursor, putative (EC:4.2.3.20)	/	/	/	/	/
1.14.14.1	Contig14037	Unigene_22025	481	2	192	1e-47	gb|ACZ48680.1|	geraniol 10-hydroxylase [Swertia mussotii]	58	5e-05	ref|NM_001070757.1|	Oryza sativa (japonica cultivar-group) Os10g0167200 (Os10g0167200) mRNA, complete cds	192	1e-47	tr|D1MI46|D1MI46_9GENT	Geraniol 10-hydroxylase OS=Swertia mussotii GN=g10h PE=2 SV=1	/	/	/	/	/	146	3e-34	pop:POPTR_48778	CYP76F3; cytochrome P450	/	/	/	/	metal ion binding;oxidoreductase activity, acting on paired donors, with incorporation or reduction of molecular oxygen, reduced flavin or flavoprotein as one donor, and incorporation of one atom of oxygen;
1.6.2.4	Contig3856	Unigene_21945	598	15	131	5e-29	gb|ADC94831.1|	cytochrome P450 reductase [Perilla frutescens]	200	7e-48	gb|GQ120439.1|	Perilla frutescens cytochrome P450 reductase mRNA, complete cds	130	8e-29	tr|Q9AU07|Q9AU07_9ROSI	NADPH-cytochrome P450 oxydoreductase isoform 2 OS=Populus trichocarpa x Populus deltoides PE=2 SV=1	70.1	3e-12	VC0384	COG0369	Sulfite reductase, alpha subunit (flavoprotein)	130	5e-29	pop:POPTR_580484	ATR2; nadph-cytochrome P450 oxydoreductase	/	/	/	/	metal ion binding;monosaccharide binding;FMN binding;
	Contig4292	Unigene_15341	233	3	99	2e-19	gb|AAN85869.1|	NADPH:P450 reductase [Glycine max]	117	3e-23	gb|FJ719368.1|	Gossypium hirsutum cultivar CRI12 NADPH:cytochrome P450 reductase (CPR1) mRNA, complete cds	99	2e-19	tr|Q8GUS1|Q8GUS1_SOYBN	NADPH:P450 reductase OS=Glycine max PE=2 SV=1	48.1	5e-06	BS_yvgR	COG0369	Sulfite reductase, alpha subunit (flavoprotein)	91.3	2e-17	rcu:RCOM_1039620	cytochrome P450, putative (EC:1.6.2.4)	/	/	/	/	metal ion binding;monosaccharide binding;FMN binding;
	Contig16097	Unigene_21945	686	14	415	1e-114	gb|ADC94831.1|	cytochrome P450 reductase [Perilla frutescens]	615	1e-172	gb|GQ120439.1|	Perilla frutescens cytochrome P450 reductase mRNA, complete cds	411	1e-113	tr|C0Z3X6|C0Z3X6_SOLSC	NADPH:cytochrome P450 reductase OS=Solenostemon scutellarioides GN=cpr PE=2 SV=1	147	2e-35	BS_yetO_2	COG0369	Sulfite reductase, alpha subunit (flavoprotein)	384	1e-105	sbi:SORBI_07g007640	SORBIDRAFT_07g007640; hypothetical protein	/	/	/	/	metal ion binding;monosaccharide binding;oxidoreductase activity, acting on NADH or NADPH, heme protein as acceptor;FMN binding;
	Contig19826	Unigene_20206	774	23	223	1e-56	emb|CAQ37789.1|	NADPH:cytochrome P450 reductase [Solenostemon scutellarioides]	478	1e-131	gb|GQ120439.1|	Perilla frutescens cytochrome P450 reductase mRNA, complete cds	223	1e-56	tr|C0Z3X6|C0Z3X6_SOLSC	NADPH:cytochrome P450 reductase OS=Solenostemon scutellarioides GN=cpr PE=2 SV=1	60.5	4e-09	SPBC365.17	COG0369	Sulfite reductase, alpha subunit (flavoprotein)	178	3e-43	rcu:RCOM_0242360	cytochrome P450, putative (EC:1.6.2.4)	/	/	/	/	metal ion binding;monosaccharide binding;oxidoreductase activity, acting on NADH or NADPH, heme protein as acceptor;FMN binding;
	GLRWUMC01B4IP6	Unigene_21945	262	1	90.1	4e-26	gb|ADC94831.1|	cytochrome P450 reductase [Perilla frutescens]	204	2e-49	gb|GQ120439.1|	Perilla frutescens cytochrome P450 reductase mRNA, complete cds	87.4	4e-25	tr|C0Z3X6|C0Z3X6_SOLSC	NADPH:cytochrome P450 reductase OS=Solenostemon scutellarioides GN=cpr PE=2 SV=1	49.7	9e-10	SA2413	COG0369	Sulfite reductase, alpha subunit (flavoprotein)	88.6	9e-25	sbi:SORBI_07g007640	SORBIDRAFT_07g007640; hypothetical protein	/	/	/	/	metal ion binding;monosaccharide binding;oxidoreductase activity, acting on NADH or NADPH, heme protein as acceptor;FMN binding;
	GLRWUMC01AI9B6	Unigene_13942	239	1	113	1e-31	gb|ACN54323.1|	NADPH:cytochrome P450 reductase [Gossypium hirsutum]	170	2e-39	gb|EU616557.1|	Capsicum annuum putative cytochrome reductase mRNA, complete cds	113	1e-31	tr|C0LLU4|C0LLU4_GOSHI	NADPH:cytochrome P450 reductase OS=Gossypium hirsutum GN=CPR1 PE=2 SV=1	60.5	1e-09	YHR042w	COG0369	Sulfite reductase, alpha subunit (flavoprotein)	107	2e-30	pop:POPTR_818445	ATR1; nadph-cytochrome P450 oxydoreductase	/	/	/	/	metal ion binding;monosaccharide binding;oxidoreductase activity, acting on NADH or NADPH, heme protein as acceptor;FMN binding;
	GLRWUMC01DAMFX	Unigene_16076	275	1	124	5e-27	gb|AAZ39649.1|	cytochrome P450 NADPH-reductase [Petunia x hybrida]	125	1e-25	gb|GQ120439.1|	Perilla frutescens cytochrome P450 reductase mRNA, complete cds	124	5e-27	tr|B3RFK3|B3RFK3_PETHY	Cytochrome P450 NADPH-reductase OS=Petunia hybrida GN=PR2 PE=2 SV=1	69.7	2e-12	VC0384	COG0369	Sulfite reductase, alpha subunit (flavoprotein)	121	2e-26	vvi:100240979	hypothetical protein LOC100240979	/	/	/	/	metal ion binding;monosaccharide binding;FMN binding;
1.1.1.255	Contig10851	Unigene_46	722	14	206	2e-51	gb|ABD73280.1|	sinapyl alcohol dehydrogenase-like 1 [Nicotiana tabacum]	89.7	2e-14	gb|AY352047.1|	Catharanthus roseus 10-hydroxygeraniol oxidoreductase mRNA, complete cds	206	2e-51	tr|Q1KV12|Q1KV12_TOBAC	Sinapyl alcohol dehydrogenase-like 1 OS=Nicotiana tabacum GN=SAD-L1 PE=2 SV=1	136	5e-32	AGc2867	COG1064	Zn-dependent alcohol dehydrogenases	199	2e-49	vvi:100258571	GSVIVT00013365001; hypothetical protein LOC100258571	/	/	/	/	metal ion binding;
	Contig12508	Unigene_5980	268	3	80.5	6e-14	ref|XP_002322822.1|	sinapyl alcohol dehydrogenase [Populus trichocarpa] gb|EEF04583.1| sinapyl alcohol dehydrogenase [Populus trichocarpa]	69.9	7e-09	gb|AY342355.1|	Camptotheca acuminata 10-hydroxygeraniol oxidoreductase mRNA, complete cds	80.5	6e-14	tr|Q5I6D6|Q5I6D6_9ROSI	Sinapyl alcohol dehydrogenase-like protein OS=Populus tremula x Populus tremuloides GN=SAD1 PE=2 SV=1	45.1	5e-05	AGc2867	COG1064	Zn-dependent alcohol dehydrogenases	80.5	3e-14	pop:POPTR_667694	SAD; sinapyl alcohol dehydrogenase	/	/	/	/	metal ion binding;
	Contig10160	Unigene_12355	647	36	165	3e-39	gb|AAQ55962.1|	10-hydroxygeraniol oxidoreductase [Catharanthus roseus]	101	5e-18	gb|EF470250.1|	Olea europaea putative mannitol dehydrogenase 1 (MTD1) mRNA, partial cds	165	3e-39	tr|Q6V4H0|Q6V4H0_CATRO	10-hydroxygeraniol oxidoreductase OS=Catharanthus roseus PE=2 SV=1	105	6e-23	AGc2867	COG1064	Zn-dependent alcohol dehydrogenases	160	7e-38	rcu:RCOM_0164590	alcohol dehydrogenase, putative (EC:1.1.1.255)	/	/	/	/	metal ion binding;
	Contig11537	Unigene_12355	640	11	326	1e-87	gb|AAQ55962.1|	10-hydroxygeraniol oxidoreductase [Catharanthus roseus]	159	2e-35	gb|EF470250.1|	Olea europaea putative mannitol dehydrogenase 1 (MTD1) mRNA, partial cds	326	9e-88	tr|Q6V4H0|Q6V4H0_CATRO	10-hydroxygeraniol oxidoreductase OS=Catharanthus roseus PE=2 SV=1	194	1e-49	ML1730	COG1064	Zn-dependent alcohol dehydrogenases	308	1e-82	pop:POPTR_735178	CADL4; cinnamyl alcohol dehydrogenase-like protein	/	/	/	/	metal ion binding;
	Contig10544	Unigene_12355	915	19	407	1e-112	gb|AAQ55962.1|	10-hydroxygeraniol oxidoreductase [Catharanthus roseus]	71.9	7e-09	emb|CR931741.1|	Medicago truncatula chromosome 5 clone mte1-54m21, COMPLETE SEQUENCE	407	1e-112	tr|Q6V4H0|Q6V4H0_CATRO	10-hydroxygeraniol oxidoreductase OS=Catharanthus roseus PE=2 SV=1	231	1e-60	ML1730	COG1064	Zn-dependent alcohol dehydrogenases	382	1e-104	pop:POPTR_735178	CADL4; cinnamyl alcohol dehydrogenase-like protein	/	/	/	/	metal ion binding;
	Contig15418	Unigene_12355	412	6	136	1e-36	gb|AAQ55962.1|	10-hydroxygeraniol oxidoreductase [Catharanthus roseus]	109	1e-20	gb|AY352047.1|	Catharanthus roseus 10-hydroxygeraniol oxidoreductase mRNA, complete cds	136	9e-37	tr|Q6V4H0|Q6V4H0_CATRO	10-hydroxygeraniol oxidoreductase OS=Catharanthus roseus PE=2 SV=1	95.1	6e-25	MA0403	COG1064	Zn-dependent alcohol dehydrogenases	134	5e-36	vvi:100258571	GSVIVT00013365001; hypothetical protein LOC100258571	/	/	/	/	metal ion binding;
	GLRWUMC01CC54O	Unigene_12355	371	1	96.7	8e-19	gb|AAQ55962.1|	10-hydroxygeraniol oxidoreductase [Catharanthus roseus]	172	9e-40	gb|HM053486.1|	Ipomoea setosa 18S ribosomal RNA gene, partial sequence	96.7	8e-19	tr|Q6V4H0|Q6V4H0_CATRO	10-hydroxygeraniol oxidoreductase OS=Catharanthus roseus PE=2 SV=1	68.2	5e-12	BS_adhA	COG1064	Zn-dependent alcohol dehydrogenases	94.4	2e-18	pop:POPTR_735178	CADL4; cinnamyl alcohol dehydrogenase-like protein	/	/	/	/	metal ion binding;
	GLRWUMC01C9OWY	Unigene_12355	304	1	90.9	4e-17	gb|AAQ55962.1|	10-hydroxygeraniol oxidoreductase [Catharanthus roseus]	69.9	8e-09	ref|XM_002263722.1|	PREDICTED: Vitis vinifera hypothetical protein LOC100265496 (LOC100265496), mRNA	90.9	4e-17	tr|Q6V4H0|Q6V4H0_CATRO	10-hydroxygeraniol oxidoreductase OS=Catharanthus roseus PE=2 SV=1	63.9	9e-11	yahK	COG1064	Zn-dependent alcohol dehydrogenases	87.8	2e-16	vvi:100261642	hypothetical protein LOC100261642	/	/	/	/	metal ion binding;
	GLRWUMC01DNEGP	Unigene_7098	172	1	74.7	2e-12	ref|XP_002322761.1|	cinnamyl alcohol dehydrogenase-like protein [Populus trichocarpa] gb|EEF04522.1| cinnamyl alcohol dehydrogenase-like protein [Populus trichocarpa]	75.8	7e-11	gb|U63534.1|FXU63534	Fragaria x ananassa cinnamyl alcohol dehydrogenase (CAD) mRNA, complete cds	74.7	2e-12	tr|Q6V4H0|Q6V4H0_CATRO	10-hydroxygeraniol oxidoreductase OS=Catharanthus roseus PE=2 SV=1	61.2	1e-10	MA0403	COG1064	Zn-dependent alcohol dehydrogenases	74.7	8e-13	pop:POPTR_735178	CADL4; cinnamyl alcohol dehydrogenase-like protein	/	/	/	/	metal ion binding;
	Contig13370	Unigene_6746	286	4	100	7e-20	gb|ACI06122.1|	cinnamyl alcohol dehydrogenase [Panax ginseng]	63.9	5e-07	gb|AY879284.1|	Ocimum basilicum geraniol dehydrogenase (GEDH) mRNA, complete cds	100	7e-20	tr|B6DMH0|B6DMH0_PANGI	Cinnamyl alcohol dehydrogenase (Fragment) OS=Panax ginseng PE=2 SV=1	79	3e-15	XF1746	COG1064	Zn-dependent alcohol dehydrogenases	99	8e-20	vvi:100255907	hypothetical protein LOC100255907	/	/	/	/	metal ion binding;
	GLRWUMC01BDZGO	Unigene_22292	267	1	79.3	4e-16	emb|CBI18802.1|	unnamed protein product [Vitis vinifera]	54	0.0004	gb|AY879284.1|	Ocimum basilicum geraniol dehydrogenase (GEDH) mRNA, complete cds	78.6	1e-15	sp|P93257|MTDH_MESCR	Probable mannitol dehydrogenase OS=Mesembryanthemum crystallinum GN=ELI3 PE=2 SV=1	58.5	4e-09	Cj1548c	COG1064	Zn-dependent alcohol dehydrogenases	78.2	3e-16	vvi:100258571	GSVIVT00013365001; hypothetical protein LOC100258571	/	/	/	/	oxidoreductase activity, acting on the CH-OH group of donors, NAD or NADP as acceptor;metal ion binding;hexitol dehydrogenase activity;
5.5.1.13	GLRWUMC01CDI8V	Unigene_14476	341	1	103	5e-21	dbj|BAD91286.1|	putative copalyl diphosphate synthase [Scoparia dulcis]	67.9	4e-08	dbj|AB169981.1|	Scoparia dulcis cps mRNA for putative copalyl diphosphate synthase, complete cds	103	5e-21	tr|Q59JI6|Q59JI6_SCODU	Putative copalyl diphosphate synthase OS=Scoparia dulcis GN=cps PE=2 SV=1	/	/	/	/	/	90.9	2e-17	pop:POPTR_798561	CPS1; copalyl diphosphate synthase; K04120 ent-copalyl diphosphate synthase [EC:5.5.1.13]	map00904	Diterpenoid biosynthesis	/	/	metal ion binding;
4.2.3.8	GLRWUMC01DY909	Unigene_12641	292	1	107	5e-22	emb|CAC83059.2|	putative terpenesynthase-1 [Marrubium vulgare]	133	6e-28	emb|AJ291755.2|	Marrubium vulgare partial tps1 gene for putative terpenesynthase-1, exons 1-7	107	4e-22	tr|Q8L6K3|Q8L6K3_MARVU	Putative terpenesynthase-1 (Fragment) OS=Marrubium vulgare GN=tps1 PE=4 SV=1	/	/	/	/	/	74.3	2e-12	rcu:RCOM_1574190	Casbene synthase, chloroplast precursor, putative (EC:4.2.3.8); K12929 casbene synthase [EC:4.2.3.8]	map00904	Diterpenoid biosynthesis	/	/	metal ion binding;
1.3.1.83	Contig12137	Unigene_21636	401	3	258	2e-67	gb|AAC19396.1|	geranylgeranyl hydrogenase [Mesembryanthemum crystallinum]	285	1e-73	gb|DQ139268.2|	Triticum aestivum geranylgeranyl hydrogenase mRNA, complete cds	258	2e-67	tr|O81335|O81335_MESCR	Geranylgeranyl hydrogenase OS=Mesembryanthemum crystallinum PE=2 SV=1	211	4e-55	alr0128	COG0644	Dehydrogenases (flavoproteins)	253	2e-66	rcu:RCOM_1471870	geranylgeranyl hydrogenase, putative ; K10960 geranylgeranyl reductase [EC:1.3.1.-]	map00900	Terpenoid backbone biosynthesis	porphyrin metabolic process;chlorophyll biosynthetic process;cofactor biosynthetic process;tetrapyrrole metabolic process;porphyrin biosynthetic process;	/	/
	Contig12609	Unigene_23538	570	4	330	4e-89	ref|XP_002521639.1|	geranylgeranyl hydrogenase, putative [Ricinus communis] gb|EEF40746.1| geranylgeranyl hydrogenase, putative [Ricinus communis]	101	4e-18	emb|AM450973.1|	Vitis vinifera, whole genome shotgun sequence, contig VV78X022081.6, clone ENTAV 115	330	4e-89	tr|B9S6M0|B9S6M0_RICCO	Geranylgeranyl hydrogenase, putative OS=Ricinus communis GN=RCOM_1110740 PE=4 SV=1	249	4e-66	alr0128	COG0644	Dehydrogenases (flavoproteins)	330	2e-89	rcu:RCOM_1110740	geranylgeranyl hydrogenase, putative	/	/	porphyrin metabolic process;chlorophyll biosynthetic process;cofactor biosynthetic process;tetrapyrrole metabolic process;porphyrin biosynthetic process;	/	/
	GLRWUMC01ANYN5	Unigene_17142	221	1	85.1	2e-15	ref|XP_002273133.1|	PREDICTED: hypothetical protein [Vitis vinifera]	56	9e-05	emb|CR931734.2|	Medicago truncatula chromosome 5 clone mth2-62m24, COMPLETE SEQUENCE	79	2e-13	tr|B9S6M0|B9S6M0_RICCO	Geranylgeranyl hydrogenase, putative OS=Ricinus communis GN=RCOM_1110740 PE=4 SV=1	58.5	4e-09	sll1091	COG0644	Dehydrogenases (flavoproteins)	85.1	1e-15	vvi:100253115	GSVIVT00017359001; hypothetical protein LOC100253115	/	/	porphyrin metabolic process;chlorophyll biosynthetic process;cofactor biosynthetic process;tetrapyrrole metabolic process;porphyrin biosynthetic process;	/	/
	GLRWUMC01EL7FQ	Unigene_21481	281	1	75.5	2e-12	sp|Q9ZS34.1|CHLP_TOBAC	RecName: Full=Geranylgeranyl diphosphate reductase, chloroplastic; AltName: Full=Geranylgeranyl reductase; Flags: Precursor emb|CAA07683.1| geranylgeranyl reductase [Nicotiana tabacum]	97.6	3e-17	gb|AY230212.1|	Prunus persica geranylgeranyl reductase mRNA, complete cds	75.5	2e-12	sp|Q9ZS34|CHLP_TOBAC	Geranylgeranyl diphosphate reductase, chloroplastic OS=Nicotiana tabacum GN=CHLP PE=2 SV=1	/	/	/	/	/	50.1	4e-05	pop:POPTR_569972	hypothetical protein; K10960 geranylgeranyl reductase [EC:1.3.1.-]	map00900	Terpenoid backbone biosynthesis	geranylgeranyl diphosphate metabolic process;vitamin biosynthetic process;porphyrin metabolic process;cellular lipid metabolic process;fat-soluble vitamin metabolic process;phospholipid metabolic process;phytyl diphosphate metabolic process;polyprenol metabolic process;chlorophyll biosynthetic process;vitamin E metabolic process;isoprenoid metabolic process;cofactor biosynthetic process;tetrapyrr…	plastid;intracellular organelle;intracellular membrane-bounded organelle;cytoplasmic part;cytoplasm;intracellular part;	/
2.5.1.32	GLRWUMC01EAHG6	Unigene_8861	153	1	90.1	8e-17	gb|AAM45379.1|	phytoene synthase [Tagetes erecta]	123	3e-25	gb|AC207704.1|	Mimulus guttatus clone MG_Bb-094P09, complete sequence	90.1	7e-17	tr|Q8L8H7|Q8L8H7_TARER	Phytoene synthase OS=Tagetes erecta GN=psy PE=2 SV=1	57.8	7e-09	slr1255	COG1562	Phytoene/squalene synthetase	79.7	5e-14	sbi:SORBI_02g032370	SORBIDRAFT_02g032370; hypothetical protein ; K02291 phytoene synthase [EC:2.5.1.32]	map00906	Carotenoid biosynthesis	/	/	/
	GLRWUMC01C38K2	Unigene_19226	224	1	63.9	6e-09	dbj|BAI47572.1|	phytoene synthase [Ipomoea sp. Kenyan]	129	7e-27	gb|AC207704.1|	Mimulus guttatus clone MG_Bb-094P09, complete sequence	63.9	6e-09	tr|Q0H903|Q0H903_COFCA	Phytoene synthase OS=Coffea canephora GN=PSY PE=2 SV=1	33.5	0.0004	alr1833	COG1562	Phytoene/squalene synthetase	63.5	4e-09	pop:POPTR_1111208	hypothetical protein; K02291 phytoene synthase [EC:2.5.1.32]	map00906	Carotenoid biosynthesis	/	/	/
	GLRWUMC01C6CFD	Unigene_9379	352	1	136	7e-44	gb|ACU29637.1|	phytoene synthase [Elaeagnus umbellata]	230	4e-57	gb|AC207704.1|	Mimulus guttatus clone MG_Bb-094P09, complete sequence	136	6e-44	tr|C7EP00|C7EP00_ELAUM	Phytoene synthase OS=Elaeagnus umbellata PE=2 SV=1	82.4	1e-21	alr1833	COG1562	Phytoene/squalene synthetase	129	1e-42	vvi:100246195	GSVIVT00023494001; hypothetical protein LOC100246195; K02291 phytoene synthase [EC:2.5.1.32]	map00906	Carotenoid biosynthesis	/	/	/
5.4.99.39	Contig11662	Unigene_14167	311	2	159	1e-37	gb|ACB87531.1|	beta-amyrin synthase [Artemisia annua]	125	2e-25	gb|AY514455.1|	Bupleurum kaoi beta-armyrin synthase (BAS) mRNA, complete cds	159	1e-37	tr|B2LRS5|B2LRS5_ARTAN	Beta-amyrin synthase OS=Artemisia annua GN=BAS PE=2 SV=1	71.2	2e-13	SPAC13G7.01c	COG1657	Squalene cyclase	154	6e-38	vvi:100259856	GSVIVT00029666001; hypothetical protein LOC100259856	/	/	/	/	/
	Contig7597	Unigene_13558	450	7	147	4e-45	dbj|BAE43642.1|	beta-amyrin synthase [Euphorbia tirucalli]	165	3e-37	ref|XM_002272088.1|	PREDICTED: Vitis vinifera hypothetical protein LOC100249623 (LOC100249623), mRNA	147	4e-45	tr|Q401R6|Q401R6_EUPTI	Beta-amyrin synthase OS=Euphorbia tirucalli GN=EtAS PE=2 SV=1	41.6	4e-08	SPAC4G9.21c	COG1657	Squalene cyclase	140	3e-43	vvi:100259856	GSVIVT00029666001; hypothetical protein LOC100259856	/	/	/	/	/
	GLRWUMC01BMF75	Unigene_23063	339	1	128	5e-36	gb|AAC17080.1|	Strong similarity to lupeol synthase gb|U49919 and cycloartenol synthase gb|U02555 from A. thaliana (the third gene with similar homology) [Arabidopsis thaliana]	99.6	1e-17	ref|XM_002272088.1|	PREDICTED: Vitis vinifera hypothetical protein LOC100249623 (LOC100249623), mRNA	128	5e-36	tr|Q3ECA8|Q3ECA8_ARATH	Putative uncharacterized protein At1g78950.1 OS=Arabidopsis thaliana GN=At1g78950 PE=4 SV=1	57	1e-08	SPAC13G7.01c	COG1657	Squalene cyclase	128	2e-36	ath:AT1G78950	beta-amyrin synthase, putative	/	/	/	/	/
	GLRWUMC01CUO3B	Unigene_18388	172	1	61.6	9e-15	dbj|BAF63702.1|	mixed amyrin synthase [Olea europaea]	54	0.0003	gb|EZ217835.1|	TSA: Artemisia annua Contig14846	61.6	9e-15	tr|A5LHW8|A5LHW8_OLEEU	Mixed amyrin synthase OS=Olea europaea GN=OEA PE=2 SV=1	40.8	5e-06	SPAC4G9.21c	COG1657	Squalene cyclase	48.9	8e-09	pop:POPTR_797146	hypothetical protein	/	/	/	/	/
	GLRWUMC01D1O7G	Unigene_21744	128	1	87.4	5e-16	ref|XP_002330453.1|	predicted protein [Populus trichocarpa] gb|EEF08996.1| predicted protein [Populus trichocarpa]	143	3e-31	dbj|AB014057.1|	Panax ginseng OSCPNY2 mRNA for beta-Amyrin Synthase, complete cds	87.4	5e-16	tr|B9N5D7|B9N5D7_POPTR	Predicted protein OS=Populus trichocarpa GN=POPTRDRAFT_784982 PE=4 SV=1	/	/	/	/	/	87.4	2e-16	pop:POPTR_784982	hypothetical protein	/	/	/	/	/
	GLRWUMC01A947I	Unigene_18388	171	1	70.5	6e-11	dbj|BAF63702.1|	mixed amyrin synthase [Olea europaea]	99.6	5e-18	dbj|AB291240.1|	Olea europaea OEA mRNA for mixed amyrin synthase, complete cds	70.5	6e-11	tr|A5LHW8|A5LHW8_OLEEU	Mixed amyrin synthase OS=Olea europaea GN=OEA PE=2 SV=1	/	/	/	/	/	66.6	4e-10	vvi:100251443	hypothetical protein LOC100251443	/	/	/	/	/
2.5.1.21	Contig10148	Unigene_6353	229	3	47.8	0.0004	gb|ACR57219.1|	squalene synthase [Salvia miltiorrhiza]	99.6	7e-18	gb|FJ768961.1|	Salvia miltiorrhiza squalene synthase mRNA, complete cds	47.8	0.0004	tr|C5I7U0|C5I7U0_SALMI	Squalene synthase OS=Salvia miltiorrhiza PE=2 SV=1	/	/	/	/	/	/	/	/	/	/	/	lipid biosynthetic process;	integral to membrane;intrinsic to membrane;membrane part;	prenyltransferase activity;
	Contig16063	Unigene_6353	830	84	239	2e-61	gb|ACR57219.1|	squalene synthase [Salvia miltiorrhiza]	406	1e-110	gb|FJ768961.1|	Salvia miltiorrhiza squalene synthase mRNA, complete cds	239	2e-61	tr|C5I7U0|C5I7U0_SALMI	Squalene synthase OS=Salvia miltiorrhiza PE=2 SV=1	84	4e-16	YHR190w	COG1562	Phytoene/squalene synthetase	223	1e-56	vvi:100265798	GSVIVT00035946001; hypothetical protein LOC100265798; K00801 farnesyl-diphosphate farnesyltransferase [EC:2.5.1.21]	map00100	Steroid biosynthesis	lipid biosynthetic process;	integral to membrane;intrinsic to membrane;membrane part;	prenyltransferase activity;
	Contig8772	Unigene_6353	829	34	486	1e-135	gb|ACR57219.1|	squalene synthase [Salvia miltiorrhiza]	803	0	gb|FJ768961.1|	Salvia miltiorrhiza squalene synthase mRNA, complete cds	486	1e-136	tr|C5I7U0|C5I7U0_SALMI	Squalene synthase OS=Salvia miltiorrhiza PE=2 SV=1	203	4e-52	SPBC646.05c	COG1562	Phytoene/squalene synthetase	471	1e-131	rcu:RCOM_1450010	farnesyl-diphosphate farnesyltransferase, putative (EC:2.5.1.21); K00801 farnesyl-diphosphate farnesyltransferase [EC:2.5.1.21]	map00100	Steroid biosynthesis	lipid biosynthetic process;	integral to membrane;intrinsic to membrane;membrane part;	prenyltransferase activity;
	Contig9786	Unigene_6353	449	31	47.4	0.0006	gb|ACR57219.1|	squalene synthase [Salvia miltiorrhiza]	/	/	/	/	47.4	0.0006	tr|C5I7U0|C5I7U0_SALMI	Squalene synthase OS=Salvia miltiorrhiza PE=2 SV=1	/	/	/	/	/	46.2	0.0006	vvi:100265798	GSVIVT00035946001; hypothetical protein LOC100265798; K00801 farnesyl-diphosphate farnesyltransferase [EC:2.5.1.21]	map00100	Steroid biosynthesis	lipid biosynthetic process;	integral to membrane;intrinsic to membrane;membrane part;	prenyltransferase activity;
	GLRWUMC01AJPI8	Unigene_6353	363	1	145	7e-48	gb|ACR57219.1|	squalene synthase [Salvia miltiorrhiza]	280	5e-72	gb|FJ768961.1|	Salvia miltiorrhiza squalene synthase mRNA, complete cds	145	7e-48	tr|C5I7U0|C5I7U0_SALMI	Squalene synthase OS=Salvia miltiorrhiza PE=2 SV=1	74.7	5e-14	YHR190w	COG1562	Phytoene/squalene synthetase	147	2e-45	rcu:RCOM_1450010	farnesyl-diphosphate farnesyltransferase, putative (EC:2.5.1.21); K00801 farnesyl-diphosphate farnesyltransferase [EC:2.5.1.21]	map00100	Steroid biosynthesis	lipid biosynthetic process;	integral to membrane;intrinsic to membrane;membrane part;	prenyltransferase activity;
	Contig17515	Unigene_8014	185	7	52.4	3e-09	gb|ACZ71037.1|	squalene synthase [Panax ginseng]	119	6e-24	gb|FJ768961.1|	Salvia miltiorrhiza squalene synthase mRNA, complete cds	53.1	3e-09	tr|D3K178|D3K178_ARAEL	Squalene synthase OS=Aralia elata PE=2 SV=1	/	/	/	/	/	50.4	5e-09	pop:POPTR_833037	hypothetical protein; K00801 farnesyl-diphosphate farnesyltransferase [EC:2.5.1.21]	map00100	Steroid biosynthesis	lipid biosynthetic process;	integral to membrane;intrinsic to membrane;membrane part;	prenyltransferase activity;
	GLRWUMC01ENKR0	Unigene_4935	135	1	58.5	3e-08	gb|ACX42426.1|	squalene synthase [Bupleurum chinense]	113	2e-22	gb|GU354313.1|	Aralia elata squalene synthase mRNA, complete cds	58.5	3e-08	tr|D0ETJ0|D0ETJ0_BUPCH	Squalene synthase OS=Bupleurum chinense PE=4 SV=1	/	/	/	/	/	56.2	6e-07	rcu:RCOM_1450010	farnesyl-diphosphate farnesyltransferase, putative (EC:2.5.1.21); K00801 farnesyl-diphosphate farnesyltransferase [EC:2.5.1.21]	map00100	Steroid biosynthesis	lipid biosynthetic process;	integral to membrane;intrinsic to membrane;membrane part;	prenyltransferase activity;
	GLRWUMC01BN5BQ	Unigene_2187	314	1	211	2e-53	dbj|BAC56854.1|	squalene synthase [Lotus japonicus]	313	3e-82	emb|AM182456.1|	Panax quinquefolius mRNA for squalene synthase 1 (sqs1 gene)	211	2e-53	tr|Q84LE3|Q84LE3_LOTJA	Squalene synthase OS=Lotus japonicus GN=LjSqS PE=2 SV=1	120	6e-28	SPBC646.05c	COG1562	Phytoene/squalene synthetase	204	1e-51	rcu:RCOM_1450010	farnesyl-diphosphate farnesyltransferase, putative (EC:2.5.1.21); K00801 farnesyl-diphosphate farnesyltransferase [EC:2.5.1.21]	map00100	Steroid biosynthesis	lipid biosynthetic process;	integral to membrane;intrinsic to membrane;membrane part;	prenyltransferase activity;
1.14.13.132	Contig17464	Unigene_18723	350	2	99	2e-19	ref|XP_002301139.1|	predicted protein [Populus trichocarpa] gb|EEE80412.1| predicted protein [Populus trichocarpa]	133	8e-28	gb|GU574803.1|	Withania somnifera squalene epoxidase mRNA, complete cds	99	2e-19	tr|B9GNL3|B9GNL3_POPTR	Predicted protein (Fragment) OS=Populus trichocarpa GN=POPTRDRAFT_411973 PE=4 SV=1	61.2	6e-10	SPBC713.12	COG0654	2-polyprenyl-6-methoxyphenol hydroxylase and related FAD-dependent oxidoreductases	99	8e-20	pop:POPTR_411973	hypothetical protein; K00511 squalene monooxygenase [EC:1.14.99.7]	map00100	Steroid biosynthesis	/	integral to membrane;intrinsic to membrane;membrane part;	adenyl nucleotide binding;FAD binding;squalene monooxygenase activity;
	GLRWUMC01EMOZE	Unigene_1435	127	1	64.3	4e-09	ref|XP_002307300.1|	predicted protein [Populus trichocarpa] gb|EEE94296.1| predicted protein [Populus trichocarpa]	67.9	1e-08	ref|XM_002271492.1|	PREDICTED: Vitis vinifera hypothetical protein LOC100265235 (LOC100265235), mRNA	64.3	4e-09	tr|B9H6N5|B9H6N5_POPTR	Predicted protein OS=Populus trichocarpa GN=POPTRDRAFT_831444 PE=4 SV=1	/	/	/	/	/	64.3	2e-09	pop:POPTR_411973	hypothetical protein; K00511 squalene monooxygenase [EC:1.14.99.7]	map00100	Steroid biosynthesis	/	integral to membrane;intrinsic to membrane;membrane part;	adenyl nucleotide binding;FAD binding;squalene monooxygenase activity;
	GLRWUMC01DTXPL	Unigene_11188	278	1	178	2e-43	gb|ADD17678.1|	squalene epoxidase [Withania somnifera]	208	1e-50	gb|GU574803.1|	Withania somnifera squalene epoxidase mRNA, complete cds	178	2e-43	tr|D3YM76|D3YM76_9SOLA	Squalene epoxidase OS=Withania somnifera PE=2 SV=1	56.6	1e-08	SPBC713.12	COG0654	2-polyprenyl-6-methoxyphenol hydroxylase and related FAD-dependent oxidoreductases	174	1e-42	rcu:RCOM_0859900	Squalene monooxygenase, putative (EC:1.14.99.7); K00511 squalene monooxygenase [EC:1.14.99.7]	map00100	Steroid biosynthesis	/	integral to membrane;intrinsic to membrane;membrane part;	adenyl nucleotide binding;FAD binding;squalene monooxygenase activity;
	GLRWUMC01D4VM7	Unigene_11691	265	1	131	2e-29	gb|AAQ13595.1|	putative squalene epoxidase [Solanum lycopersicum]	65.9	1e-07	dbj|AK327783.1|	Solanum lycopersicum cDNA, clone: LEFL2037N17, HTC in fruit	131	2e-29	tr|Q4A570|Q4A570_SOLLC	Putative squalene epoxidase OS=Solanum lycopersicum GN=ERG PE=4 SV=1	62	4e-10	SPBC713.12	COG0654	2-polyprenyl-6-methoxyphenol hydroxylase and related FAD-dependent oxidoreductases	122	9e-27	osa:4332153	Os03g0231800; hypothetical protein ; K00511 squalene monooxygenase [EC:1.14.99.7]	map00100	Steroid biosynthesis	/	integral to membrane;intrinsic to membrane;membrane part;	adenyl nucleotide binding;FAD binding;squalene monooxygenase activity;
1.14.13.70	Contig4169	Unigene_3102	373	3	8.555	1e-49	emb|CAL69911.1|	obtusifoliol-14-demethylase [Petunia x hybrida]	81.8	3e-12	dbj|AK336810.1|	Lotus japonicus cDNA, clone: LjFL1-027-DD12, HTC	198	1e-49	tr|A0PFU3|A0PFU3_PETHY	Obtusifoliol-14-demethylase OS=Petunia hybrida GN=cyp51 PE=2 SV=1	72.8	2e-13	Rv0764c	COG2124	Cytochrome P450	190	3e-47	vvi:100242104	GSVIVT00006211001; hypothetical protein LOC100242104; K05917 cytochrome P450, family 51, subfamily A (sterol 14-demethylase) [EC:1.14.13.70]	map00100	Steroid biosynthesis	/	/	methyltransferase activity;metal ion binding;
	GLRWUMC01AO9Z6	Unigene_18224	220	1	2.852	9e-24	gb|AAL54888.1|AF116915_1	obtusifoliol-14-demethylase [Nicotiana tabacum]	123	4e-25	gb|EU727154.1|	Gossypium hirsutum obtusifoliol-14alpha-demethylase mRNA, complete cds	113	8e-24	tr|Q8GZV0|Q8GZV0_TOBAC	Obtusifoliol-14-demethylase OS=Nicotiana tabacum GN=CYP51 PE=2 SV=1	/	/	/	/	/	109	4e-23	pop:POPTR_48605	CYP51G1; cytochrome P450 obtusifoliol 14-alpha-demethylase; K05917 cytochrome P450, family 51, subfamily A (sterol 14-demethylase) [EC:1.14.13.70]	map00100	Steroid biosynthesis	/	/	methyltransferase activity;metal ion binding;
	GLRWUMC01BAJ79	Unigene_3050	272	1	2.852	9e-31	gb|AAL40888.1|	obtusifoliol-14-demethylase [Nicotiana tabacum]	91.7	2e-15	gb|AY065641.1|	Nicotiana tabacum obtusifoliol-14-demethylase (NtCYP51-2) mRNA, complete cds	102	9e-31	tr|Q8GVD5|Q8GVD5_TOBAC	Obtusifoliol-14-demethylase OS=Nicotiana tabacum GN=NtCYP51-2 PE=2 SV=1	/	/	/	/	/	101	8e-31	vvi:100252340	GSVIVT00001689001; hypothetical protein LOC100252340; K05917 cytochrome P450, family 51, subfamily A (sterol 14-demethylase) [EC:1.14.13.70]	map00100	Steroid biosynthesis	/	/	methyltransferase activity;metal ion binding;
	GLRWUMC01CETAO	Unigene_18122	136	1	2.852	3e-17	ref|XP_002299356.1|	cytochrome P450 obtusifoliol 14-alpha-demethylase [Populus trichocarpa] gb|EEE84161.1| cytochrome P450 obtusifoliol 14-alpha-demethylase [Populus trichocarpa]	65.9	5e-08	dbj|AK248734.1|	Hordeum vulgare subsp. vulgare cDNA clone: FLbaf2i22, mRNA sequence	91.7	3e-17	tr|B9GMU7|B9GMU7_POPTR	Cytochrome P450 obtusifoliol 14-alpha-demethylase OS=Populus trichocarpa GN=CYP51G1 PE=3 SV=1	41.6	0.0005	Rv0764c	COG2124	Cytochrome P450	91.7	1e-17	pop:POPTR_48605	CYP51G1; cytochrome P450 obtusifoliol 14-alpha-demethylase; K05917 cytochrome P450, family 51, subfamily A (sterol 14-demethylase) [EC:1.14.13.70]	map00100	Steroid biosynthesis	/	/	methyltransferase activity;metal ion binding;
1.3.1.70	Contig13735	Unigene_7475	462	2	263	4e-69	ref|XP_002326242.1|	predicted protein [Populus trichocarpa] gb|EEE71912.1| predicted protein [Populus trichocarpa]	224	4e-55	ref|XM_002528537.1|	Ricinus communis C-14 sterol reductase, putative, mRNA	263	4e-69	tr|B9MTN8|B9MTN8_POPTR	Predicted protein OS=Populus trichocarpa GN=POPTRDRAFT_826487 PE=4 SV=1	/	/	/	/	/	263	2e-69	pop:POPTR_826487	hypothetical protein; K00222 delta14-sterol reductase [EC:1.3.1.70]	map00100	Steroid biosynthesis	/	/	/
	GLRWUMC01BITNQ	Unigene_3741	288	1	54.7	4e-06	ref|XP_002283576.1|	PREDICTED: similar to FK (FACKEL); delta14-sterol reductase [Vitis vinifera] emb|CBI30243.1| unnamed protein product [Vitis vinifera]	56	0.0001	gb|AC119676.2|	Homo sapiens chromosome 1 clone RP5-820O16, complete sequence	51.6	3e-05	tr|B9MTN8|B9MTN8_POPTR	Predicted protein OS=Populus trichocarpa GN=POPTRDRAFT_826487 PE=4 SV=1	/	/	/	/	/	54.7	2e-06	vvi:100247778	similar to FK (FACKEL); delta14-sterol reductase; K00222 delta14-sterol reductase [EC:1.3.1.70]	map00100	Steroid biosynthesis	/	/	/
1.14.13.72	Contig13633	Unigene_11433	536	7	109	1e-22	ref|XP_002520505.1|	C-4 methyl sterol oxidase, putative [Ricinus communis] gb|EEF41918.1| C-4 methyl sterol oxidase, putative [Ricinus communis]	139	2e-29	dbj|AK322406.1|	Solanum lycopersicum cDNA, clone: LEFL1037CC06, HTC in leaf	109	1e-22	tr|B9S3D6|B9S3D6_RICCO	C-4 methyl sterol oxidase, putative OS=Ricinus communis GN=RCOM_0732630 PE=4 SV=1	43.1	0.0003	SPAC630.08c	COG3000	Sterol desaturase	109	6e-23	rcu:RCOM_0732630	C-4 methyl sterol oxidase, putative (EC:1.14.13.72); K07750 methylsterol monooxygenase [EC:1.14.13.72]	map00100	Steroid biosynthesis	lipid biosynthetic process;oxoacid metabolic process;fatty acid biosynthetic process;cellular lipid metabolic process;fatty acid metabolic process;organic acid biosynthetic process;	integral to membrane;intracellular organelle;intracellular membrane-bounded organelle;intrinsic to membrane;cytoplasmic part;membrane part;cytoplasm;endoplasmic reticulum;intracellular part;	oxidoreductase activity, acting on paired donors, with incorporation or reduction of molecular oxygen, NADH or NADPH as one donor, and incorporation of one atom of oxygen;metal ion binding;
	GLRWUMC01C7059	Unigene_11433	224	1	100	6e-20	ref|XP_002520505.1|	C-4 methyl sterol oxidase, putative [Ricinus communis] gb|EEF41918.1| C-4 methyl sterol oxidase, putative [Ricinus communis]	121	2e-24	dbj|AK322406.1|	Solanum lycopersicum cDNA, clone: LEFL1037CC06, HTC in leaf	100	6e-20	tr|B9S3D6|B9S3D6_RICCO	C-4 methyl sterol oxidase, putative OS=Ricinus communis GN=RCOM_0732630 PE=4 SV=1	/	/	/	/	/	100	3e-20	rcu:RCOM_0732630	C-4 methyl sterol oxidase, putative (EC:1.14.13.72); K07750 methylsterol monooxygenase [EC:1.14.13.72]	map00100	Steroid biosynthesis	lipid biosynthetic process;oxoacid metabolic process;fatty acid biosynthetic process;cellular lipid metabolic process;fatty acid metabolic process;organic acid biosynthetic process;	integral to membrane;intracellular organelle;intracellular membrane-bounded organelle;intrinsic to membrane;cytoplasmic part;membrane part;cytoplasm;endoplasmic reticulum;intracellular part;	oxidoreductase activity, acting on paired donors, with incorporation or reduction of molecular oxygen, NADH or NADPH as one donor, and incorporation of one atom of oxygen;metal ion binding;
5.3.3.5	GLRWUMC01AQ66M	Unigene_22678	328	1	100	4e-20	ref|NP_001041757.1|	Os01g0103600 [Oryza sativa (japonica cultivar-group)] sp|Q9FTZ2.1|EBP_ORYSJ RecName: Full=Probable 3-beta-hydroxysteroid-Delta(8),Delta(7)-isomerase; AltName: Full=Cholestenol Delta-isomerase; AltName: Full=Delta(8)-Delta(7) sterol isomerase; Short=D8-D7 sterol isomerase dbj|BAB16323.1| putative phenylalkylamine binding protein [Oryza sativa Japonica Group] dbj|BAB92148.1| putative C-8,7 sterol i…	54	0.0005	gb|BT009558.1|	Triticum aestivum clone wre1n.pk0001.e3:fis, full insert mRNA sequence	100	4e-20	tr|B8ACS4|B8ACS4_ORYSI	Putative uncharacterized protein OS=Oryza sativa subsp. indica GN=OsI_00031 PE=4 SV=1	/	/	/	/	/	100	2e-20	osa:4326449	Os01g0103600; hypothetical protein ; K01824 cholestenol delta-isomerase [EC:5.3.3.5]	map00100	Steroid biosynthesis	/	/	/
5.4.99.8	Contig5999	Unigene_19623	311	2	48.1	1e-06	ref|XP_002531376.1|	Cycloartenol synthase, putative [Ricinus communis]	/	/	/	/	46.2	0.001	tr|B9SZF7|B9SZF7_RICCO	Cycloartenol synthase, putative (Fragment) OS=Ricinus communis GN=RCOM_0645120 PE=4 SV=1	/	/	/	/	/	48.1	0.0002	vvi:100253606	hypothetical protein LOC100253606	/	/	/	/	oxidosqualene cyclase activity;
	Contig13862	Unigene_6119	377	2	77.4	5e-13	gb|AAQ57198.1|	cycloartenol synthase [Glycine max]	119	1e-23	gb|EZ224967.1|	TSA: Artemisia annua Contig21978	77.4	5e-13	tr|Q9SSZ2|Q9SSZ2_9ASPA	Oxidosqualene cyclase OS=Allium macrostemon GN=ALLOSC1 PE=2 SV=1	/	/	/	/	/	77	3e-13	vvi:100243389	GSVIVT00016985001; hypothetical protein LOC100243389; K01853 cycloartenol synthase [EC:5.4.99.8]	map00100	Steroid biosynthesis	/	/	/
	GLRWUMC01ADBIF	Unigene_14722	174	1	100	6e-20	ref|XP_002334384.1|	predicted protein [Populus trichocarpa] gb|EEF09030.1| predicted protein [Populus trichocarpa]	93.7	3e-16	ref|XM_002527764.1|	Ricinus communis cycloartenol synthase, putative, mRNA	100	5e-20	tr|B9NGJ9|B9NGJ9_POPTR	Predicted protein OS=Populus trichocarpa GN=POPTRDRAFT_790602 PE=4 SV=1	51.6	5e-07	SPAC13G7.01c	COG1657	Squalene cyclase	100	3e-20	pop:POPTR_417048	hypothetical protein	/	/	/	/	/
	GLRWUMC01ALJZF	Unigene_23912	166	1	110	7e-23	gb|AAC04931.1|	cycloartenol synthase [Arabidopsis thaliana]	153	4e-34	ref|XM_002264336.1|	PREDICTED: Vitis vinifera hypothetical protein LOC100243389, transcript variant 2 (LOC100243389), mRNA	110	7e-23	sp|P38605|CAS1_ARATH	Cycloartenol synthase OS=Arabidopsis thaliana GN=CAS1 PE=1 SV=2	45.4	3e-05	SPAC13G7.01c	COG1657	Squalene cyclase	110	3e-23	ath:AT2G07050	CAS1; CAS1 (CYCLOARTENOL SYNTHASE 1); cycloartenol synthase ; K01853 cycloartenol synthase [EC:5.4.99.8]	map00100	Steroid biosynthesis	/	/	/
	GLRWUMC01C58ZJ	Unigene_14956	132	1	55.1	4e-10	dbj|BAA33460.1|	Cycloartenol Synthase [Panax ginseng]	101	9e-19	ref|XM_002264336.1|	PREDICTED: Vitis vinifera hypothetical protein LOC100243389, transcript variant 2 (LOC100243389), mRNA	55.1	4e-10	tr|O82139|O82139_PANGI	Cycloartenol Synthase OS=Panax ginseng GN=OSCPNX1 PE=2 SV=1	/	/	/	/	/	60.5	8e-10	osa:4328256	Os02g0139700; hypothetical protein ; K01853 cycloartenol synthase [EC:5.4.99.8]	map00100	Steroid biosynthesis	/	/	/
	GLRWUMC01DSG9X	Unigene_9063	79	1	/	/	/	/	97.6	7e-18	ref|XM_002527766.1|	Ricinus communis Cycloartenol synthase, putative, mRNA	40.4	0.001	tr|Q9SLP9|Q9SLP9_LUFCY	Cycloartenol synthase OS=Luffa cylindrica GN=LcCAS1 PE=2 SV=1	/	/	/	/	/	40.4	0.0007	ath:AT2G07050	CAS1; CAS1 (CYCLOARTENOL SYNTHASE 1); cycloartenol synthase ; K01853 cycloartenol synthase [EC:5.4.99.8]	map00100	Steroid biosynthesis	/	/	/
