# Supplementary material for: Transcriptome Analysis Reveals Putative Genes Involved in Iridoid Biosynthesis in Rehmannia glutinosa
Source: Int J Mol Sci. 2012 Oct 23;13(10):13748–63. doi: 10.3390/ijms131013748 (PMC3509546; doi:10.3390/ijms131013748)
Supplement: Supplementary file 3 [file ijms-13-13748-s003.xls]

## Sheet: Sheet1
Enzyme	Gene ID	Gene length	Description of best homologue	Accession	Species	Length of homologue	Alignment region	Identity	E-value
GES	Contig5255	180	geraniol synthase	AAR11765.1	Ocimum basilicum	567	1(288)-180(347)	52/60 (87%)	7e-35
	Contig5255	180	plastid geraniol synthase	AFD64744.1	Catharanthus roseus	589	1(308)-180(367)	52/60 (87%)	1e-34
10HGO	Contig10851	722	10-hydroxygeraniol oxidoreductase	AAQ55962.1	Catharanthus roseus	360	1(227)-399(359)	100/133 (75%)	7e-70
	Contig10160	647	10-hydroxygeraniol oxidoreductase	AAQ55962.1	Catharanthus roseus	360	1(262)-294(359)	80/98 (82%)	2e-53
	Contig11537	640	10-hydroxygeraniol oxidoreductase	AAQ55962.1	Catharanthus roseus	360	3(48)-587(242)	168/195 (86%)	6e-105
	Contig10544	915	10-hydroxygeraniol oxidoreductase	AAQ55962.1	Catharanthus roseus	360	3(31)-914(335)	216/305 (71%)	1e-137
	Contig12508	268	10-hydroxygeraniol oxidoreductase	AAQ55962.1	Catharanthus roseus	360	1(179)-249(261)	64/83 (77%)	8e-19
	Contig13370	286	10-hydroxygeraniol oxidoreductase	AAQ55962.1	Catharanthus roseus	360	1(299)-180(358)	48/60 (80%)	6e-30
	Contig15418	412	10-hydroxygeraniol oxidoreductase	AAQ55962.1	Catharanthus roseus	360	116(1)-367(89)	65/89 (73%)	2e-42
	GLRWUMC01CC54O	371	10-hydroxygeraniol oxidoreductase	AAQ55962.1	Catharanthus roseus	360	77(301)-253(359)	43/59 (73%)	4e-29
	GLRWUMC01C9OWY	304	10-hydroxygeraniol oxidoreductase	AAQ55962.1	Catharanthus roseus	360	302(307)-147(358)	42/52 (81%)	2e-27
	GLRWUMC01BDZGO	267	10-hydroxygeraniol oxidoreductase	AAQ55962.1	Catharanthus roseus	360	142(26)-267(67);96（11)-146(27)	31/42 (74%)	5e-22
	GLRWUMC01DNEGP	172	10-hydroxygeraniol oxidoreductase	AAQ55962.1	Catharanthus roseus	360	149(56)-3(103);172(49)-152(55);	34/49 (69%)	2e-21
G10H	Contig14037	481	geraniol 10-hydroxylase	CAC80883.1	Catharanthus roseus	493	350(40)-3(155)	93/116 (80%)	4e-63
CPR	Contig3856	598	Full=NADPH--cytochrome P450 reductase; Short=CPR	Q05001.1	Catharanthus roseus	714	596(651)-405(714)	52/64 (81%)	6e-36
	Contig4292	233	Full=NADPH--cytochrome P450 reductase; Short=CPR	Q05001.1	Catharanthus roseus	714	3(667)-146(714)	37/48 (77%)	7e-24
	Contig16097	686	Full=NADPH--cytochrome P450 reductase; Short=CPR	Q05001.1	Catharanthus roseus	714	25(433)-649(716)	182/217 (84%)	3e-136
	Contig19826	774	Full=NADPH--cytochrome P450 reductase; Short=CPR	Q05001.1	Catharanthus roseus	714	219(1)-773(186)	128/187 (68%)	5e-52
	GLRWUMC01B4IP6	262	Full=NADPH--cytochrome P450 reductase; Short=CPR	Q05001.1	Catharanthus roseus	714	149(600)-6(647)	36/48 (75%)	7e-30
	GLRWUMC01AI9B6	239	Full=NADPH--cytochrome P450 reductase; Short=CPR	Q05001.1	Catharanthus roseus	714	170(527)-3(582)	45/56 (80%)	6e-35
	GLRWUMC01DAMFX	275	Full=NADPH--cytochrome P450 reductase; Short=CPR	Q05001.1	Catharanthus roseus	714	3(651)-194(714)	55/64 (86%)	3e-38
FPPS	Contig8108	724	farnesyl diphosphate synthase short form	AAB07264.1	Arabidopsis thaliana	343	695(102)-3(332)	187/231 (81%)	4e-146
	Contig20014	192	farnesyl diphosphate synthase 1	NP_199588.1	Arabidopsis thaliana	384	117(44)-191(68)	17/25 (68%)	3e-09
	Contig21413	142	farnesyl diphosphate synthase 1	NP_199588.1	Arabidopsis thaliana	384	38(103)-124(131);1(91)-60(110)	20/29 (69%);14/20 (70%)	5e-11
	GLRWUMC01A2CVF	142	farnesyl diphosphate synthase 1	NP_199588.1	Arabidopsis thaliana	384	1(147)-141(193)	41/47 (87%)	7e-31
	GLRWUMC01EOJIN	86	farnesyl diphosphate synthase short form	AAB07264.1	Arabidopsis thaliana	343	83(306)-3(332)	18/27 (67%)	3e-10
GPPS	Contig17725	327	geranyl diphosphate synthase large subunit	AAS82860.1	Antirrhinum majus	372	300(307)-103(372)	63/66 (95%)	1e-40
	GLRWUMC01AL3AR	115	geranyl diphosphate synthase large subunit	AAS82860.1	Antirrhinum majus	372	2(246)-115(283)	35/38 (92%)	6e-21
	Contig17725	327	geranyl diphosphate synthase large subunit	ACQ90682.1	Humulus lupulus	369	321(297)-103(369)	63/73 (86%)	1e-40
	GLRWUMC01AL3AR	115	geranyl diphosphate synthase large subunit	ACQ90682.1	Humulus lupulus	369	2(243)-115(280)	30/38 (79%)	3e-17
GGPPS	Contig11800	322	geranylgeranyl pyrophosphate synthase	AAA32797.1	Arabidopsis thaliana	371	2(268)-313(371)	79/104 (76%)	5e-52
	Contig13466	175	geranylgeranyl diphosphate synthase, type II	NP_195558.1	Arabidopsis thaliana	326	3(76)-173(132)	54/57 (95%)	9e-34
	Contig1814	431	geranylgeranyl diphosphate synthase 7	NP_179452.1	Arabidopsis thaliana	347	401(93)-3(223)	88/133 (66%)	6e-61
	Contig6256	472	geranylgeranyl diphosphate synthase 10	NP_188651.1	Arabidopsis thaliana	344	3(223)-260(308)	61/86 (71%)	2e-30
	Contig6918	336	geranylgeranyl diphosphate synthase, type II	NP_195558.1	Arabidopsis thaliana	326	329(6)-3(168)	87/109 (80%)	1e-60
	GLRWUMC01AYUSU	383	geranylgeranyl diphosphate synthase 11	NP_189589.1	Arabidopsis thaliana	344	2(277)-214(355)	31/82 (38%)	2e-09
	GLRWUMC01B9C9W	195	geranylgeranyl diphosphate synthase 10	NP_188651.1	Arabidopsis thaliana	344	15(214)-179(268)	38/55 (69%)	9e-25
	GLRWUMC01CGPQW	204	geranylgeranyl pyrophosphate synthase-related protein	AAA81879.1	Arabidopsis thaliana	326	2(243)-64(263)	17/21 (81%)	5e-08
	GLRWUMC01CO3TB	160	geranylgeranyl diphosphate synthase, type II	NP_195558.1	Arabidopsis thaliana	326	2(158)-157(209)	35/52 (67%)	8e-22
	Contig11800	322	geranyl diphosphate synthase large subunit	AAS82860.1	Antirrhinum majus	372	2(269)-313(372)	81/104 (78%)	4e-52
	Contig13466	175	geranyl diphosphate synthase large subunit	AAS82860.1	Antirrhinum majus	372	3(110)-173(165)	36/57 (63%)	3e-22
	Contig1814	431	geranyl diphosphate synthase large subunit	AAS82860.1	Antirrhinum majus	372	398(120)-3(248)	89/132 (67%)	6e-63
	Contig6256	472	geranyl diphosphate synthase large subunit	AAS82860.1	Antirrhinum majus	372	3(251)-278(342)	61/92 (66%)	2e-30
	Contig6918	336	geranyl diphosphate synthase large subunit	AAS82860.1	Antirrhinum majus	372	329(94)-3(201)	60/109 (55%)	3e-43
	GLRWUMC01AYUSU	383	geranyl diphosphate synthase large subunit	AAS82860.1	Antirrhinum majus	372	2(292)-202(366)	26/77 (34%)	6e-08
	GLRWUMC01B9C9W	195	geranyl diphosphate synthase large subunit	AAS82860.1	Antirrhinum majus	372	18(243)-179(296)	42/54 (78%)	4e-25
	GLRWUMC01CGPQW	204	geranyl diphosphate synthase large subunit	AAS82860.1	Antirrhinum majus	372	2(280)-67(301)	12/22 (55%)	7e-07
	GLRWUMC01CO3TB	160	geranyl diphosphate synthase large subunit	AAS82860.1	Antirrhinum majus	372	2(191)-148(237)	19/49 (39%)	1e-08
	Contig11800	322	geranyl diphosphate synthase large subunit	ACQ90682.1	Humulus lupulus	369	2(266)-313(369)	80/104 (77%)	3e-54
	Contig13466	175	geranyl diphosphate synthase large subunit	ACQ90682.1	Humulus lupulus	369	2(266)-313(370)	37/57 (65%)	2e-22
	Contig1814	431	geranyl diphosphate synthase large subunit	ACQ90682.1	Humulus lupulus	369	398(117)-3(245)	88/132 (67%)	2e-60
	Contig6256	472	geranyl diphosphate synthase large subunit	ACQ90682.1	Humulus lupulus	369	3(248)-278(339)	59/92 (64%)	5e-29
	Contig6918	336	geranyl diphosphate synthase large subunit	ACQ90682.1	Humulus lupulus	369	314(96)-3(198)	64/104 (62%)	1e-44
	GLRWUMC01AYUSU	383	geranyl diphosphate synthase large subunit	ACQ90682.1	Humulus lupulus	369	2(289)-202(363)	26/77 (34%)	7e-08
	GLRWUMC01B9C9W	195	geranyl diphosphate synthase large subunit	ACQ90682.1	Humulus lupulus	369	18(40)-176(292)	45/53 (85%)	5e-28
	GLRWUMC01CGPQW	204	geranyl diphosphate synthase large subunit	ACQ90682.1	Humulus lupulus	369	2(277)-67(298)	11/22 (50%)	4e-06
	GLRWUMC01CO3TB	160	geranyl diphosphate synthase large subunit	ACQ90682.1	Humulus lupulus	369	2(188)-151(235)	20/50 (40%)	2e-10
